# Supplementary material for: Theoretical investigation of the side-chain mechanism of the MTO process over H-SSZ-13 using DFT and ab initio calculations
Source: Royal Society of Chemistry journal article supplement (doi:10.1039/d1cy00433f), 2021-01-01
Supplement: d1cy00433f1.pdf [file d1cy00433f1.pdf]

## SUPPLEMENTARY INFORMATION – THEORETICAL INVESTIGATION OF THE SIDE-CHAIN MECHANISM OF THE MTO PROCESS OVER H-SSZ-13 USING DFT AND AB-INITIO CALCULATIONS

Michal Fečík,<sup>a</sup> Philipp N. Plessow,<sup>\*, a</sup> and Felix Studt<sup>a, b</sup>

<sup>a</sup> Institute of Catalysis Research and Technology, Karlsruhe Institute of Technology, Hermann-von-Helmholtz Platz 1, 76344 Eggenstein-Leopoldshafen, Germany

<sup>b</sup> Institute for Chemical Technology and Polymer Chemistry, Karlsruhe Institute of Technology, Engesserstrasse 18, 76131 Karlsruhe, Germany

\* Corresponding author - email: philipp.plessow@kit.edu

### TABLE OF CONTENTS

|                                                       |           |
|-------------------------------------------------------|-----------|
| <b>S 1 FURTHER COMPUTATIONAL DETAILS</b> .....        | <b>1</b>  |
| <b>S 2 ZEOLITE STRUCTURE</b> .....                    | <b>1</b>  |
| <b>S 3 CLUSTER MODELS AND CORRECTIONS</b> .....       | <b>2</b>  |
| <b>S 4 PENTAMETHYLBENZENE ISOMERS</b> .....           | <b>4</b>  |
| <b>S 5 DIFFERENT GEM-METHYLATION POSITIONS</b> .....  | <b>5</b>  |
| <b>S 6 STEPWISE METHYLATIONS</b> .....                | <b>6</b>  |
| <b>S 7 COMPARISON WITH DATA FROM LITERATURE</b> ..... | <b>6</b>  |
| <b>S 8 TOTAL ENERGIES AND VIBRATIONS</b> .....        | <b>7</b>  |
| <b>S 9 DATA OF THE STUDIED STRUCTURES</b> .....       | <b>23</b> |
| <b>S 10 ADDITIONAL REFERENCES</b> .....               | <b>23</b> |

### S 1 FURTHER COMPUTATIONAL DETAILS

The Brillouin zone was sampled at the  $\Gamma$ -point and Gaussian smearing with a width of 0.1 eV was used. All atoms in the unit cell were structurally optimized with a convergence criterion of 0.001 eV/Å for the norm of the force on each atom and  $10^{-8}$  eV for the total energy. Hessian matrices were calculated for all studied structures, obtaining ZPE corrections to the calculated energy. The vibrational frequencies were obtained in the harmonic oscillator approximation using a central finite difference scheme with displacements of  $\pm 0.01$  Å. Adsorbate species in the gas phase were calculated in a cubic cell with a separation of 20 Å of vacuum to the next periodic image.

As described in the main text, 46T cluster models were constructed from the periodic structures. All energy corrections in this work were then computed as single point energies on these structures. DLPNO-calculations were performed using cc-pVXZ basis set for X = D, T, Q (i.e. double, triple, quadruple). Restricted Hartree-Fock energies for X = T, Q were computed within the RIJCOSX approximation with grid X6. For subsequent correlation treatment (X = D, T), an SCF-convergence criterion of  $10^{-9}$  Hartree was employed and  $10^{-7}$  Hartree to obtain only the Hartree Fock energy (X = Q). DLPNO-calculations were run using the 'TightPNO' setting.

#### S 1A SYMMETRY NUMBER OF GAS PHASE MOLECULES

Table S1 contains symmetries and corresponding symmetry numbers for the studied gas-phase species used for calculation of thermal corrections via the ideal gas approach. (Abbreviations: MeOH = methanol.)

**Table S1. Symmetries and corresponding symmetry numbers  $\sigma$  of the studied gas-phase species**

| Molecule         | Symmetry        | $\sigma$ |
|------------------|-----------------|----------|
| H <sub>2</sub> O | C <sub>2v</sub> | 2        |
| MeOH             | C <sub>s</sub>  | 1        |

### S 2 ZEOLITE STRUCTURE

#### S 2A ADDITIONAL INFORMATION

The CHA zeolite crystallizes in  $R\bar{3}m$  (#166) space group. The framework contains 4, 6 and 8-membered silicon rings and its unit cell consists of 108 atoms. Present tetrahedral atoms (T-atoms) are crystallographically indistinguishable and equal, i.e. there is only T1. Optimization of the framework was carried out for the kinetic cutoff of 800 eV with the convergence criterion set for the net force on each atom being 0.01 eV/Å. Optimized lattice constants obtained this way are  $a = 13.625$  Å,  $b = 13.625$  Å and  $c = 15.067$  Å. For comparison, experimental data<sup>1</sup> are  $a = 13.675$  Å,  $b = 13.675$  Å and  $c = 14.767$  Å. These optimized lattice parameters were used for calculations of the Al-substituted framework, H-SSZ-13.

## S 2B FIGURES OF THE FRAMEWORK

Figures S1 and S2 were produced by VESTA.<sup>2</sup>

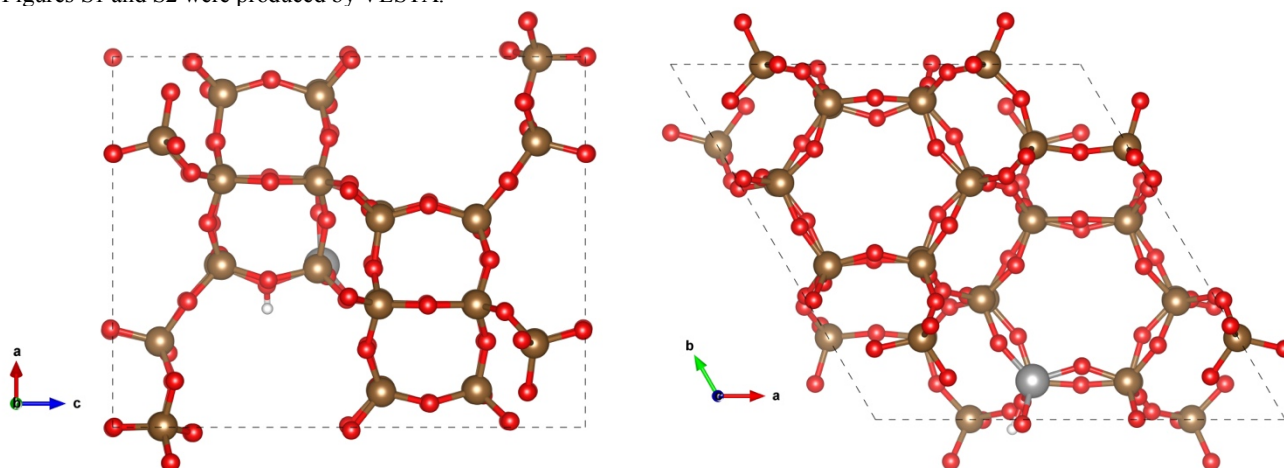

**Figure S1.** Unit cell of H-SSZ-13 used in the present study viewed along *b* and *c* directions respectively. Colour code: H = white, O = red, Si = brown, Al = gray.

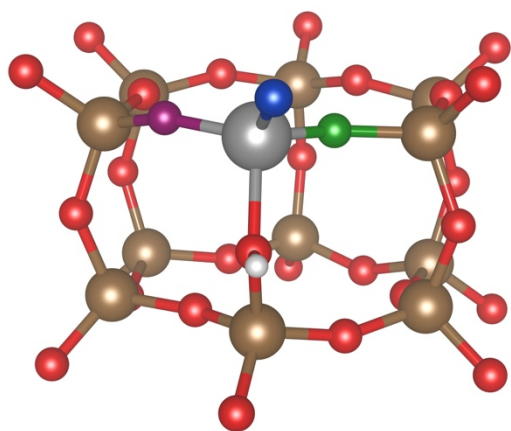

**Figure S2.** A double 6-ring of the CHA framework with color distinguished available active O-sites, shown in the perspective regime of the VESTA program. Active O-sites (numbering according to IZA): purple = O1, blue = O2, green = O3, red (with attached H) = O4.

## S 2C COMPARISON OF O-SITE ENERGIES

Table S2 shows PBE-D3 energy differences of different O-sites neighboring with the substituted Al atom of empty H-SSZ-13, zeolite with adsorbed PMB and adsorbed HMB, all relative to the most stable O-site – O2. Except for O3, which is basically inaccessible, the stability is in the range of 0.1 eV.

**Table S2.** PBE-D3 energy differences of different active O-sites of empty H-SSZ-13 ( $\Delta E_{\text{empty}}$ ), H-SSZ-13 with adsorbed PMB ( $\Delta E_{\text{PMB}}$ ) and with adsorbed HMB ( $\Delta E_{\text{HMB}}$ ). All energies are relative to O4-site and are in eV.

| O-site | $E_{\text{empty}}$ [eV] | $E_{\text{PMB}}$ [eV] | $\Delta E_{\text{HMB}}$ [eV] |
|--------|-------------------------|-----------------------|------------------------------|
| O1     | +0.038                  | +0.133                | -0.005                       |
| O2     | +0.111                  | -0.087                | -0.001                       |
| O3     | +0.407                  | X                     | X                            |
| O4     | +0.000                  | +0.000                | +0.000                       |

## S 3 CLUSTER MODELS AND CORRECTIONS

Non-periodic calculations carried out with the ORCA and TURBOMOLE program packages were performed on 46T (46 tetrahedra atoms) cluster systems. TURBOMOLE rather than ORCA was used for the PBE-D3 calculations on cluster models for backward compatibility with existing calculations from previous publications.<sup>3-4</sup> The clusters were cut out of the studied H-SSZ-13 framework so they capture the whole CHA pore in which the active Brønsted O-site is located. All used cluster models were terminated by hydrogen atoms for proper valences. Figure S3 shows an example of 46T containing one HMB molecule. Figure S4 shows the Gibbs free energy profiles of HMB mediated side-chain mechanism of the MTO process (a) with cluster corrections, and (b) at the PBE-D3 level of theory.

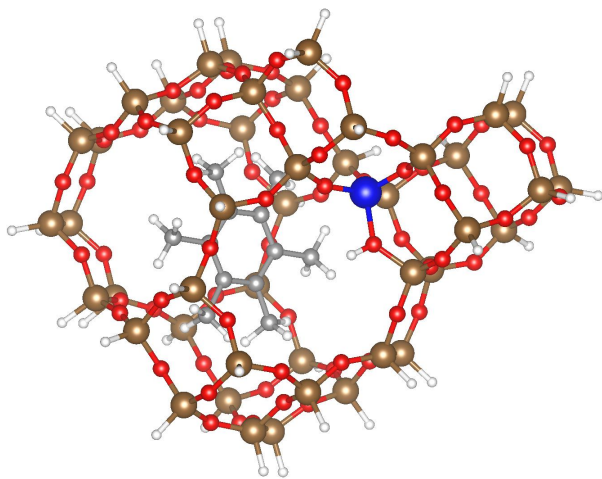

**Figure S3.** Example of a 46T cluster used during calculations. Here, the pore contains one hexamethylbenzene molecule. Color code: H = white, O = red, Si = brown, Al = blue, C = gray.

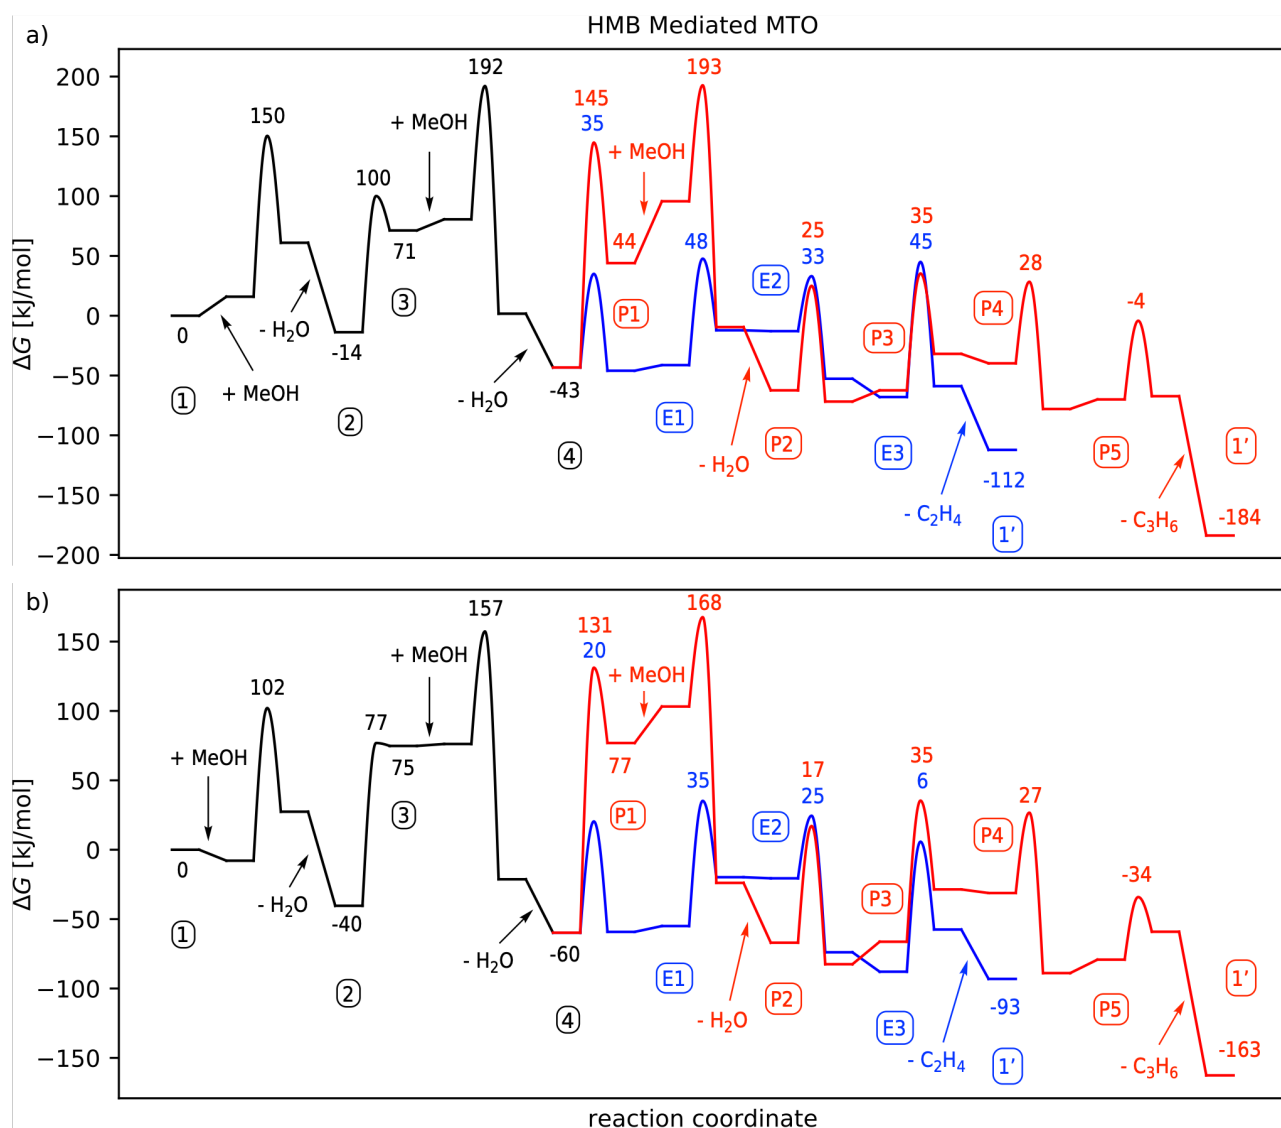

**Figure S4.** The Gibbs free energy profiles of HMB mediated side-chain mechanism of the MTO process with cluster corrected free energies (a), and at the PBE-D3 level of theory (b). All free energies are in kJ/mol and were obtained for 400 °C and a reference pressure of 1 bar. Indices (numbers in boxes) and colours are taken from Figure 1(a) from the main text.

## S 4 PENTAMETHYLBENZENE ISOMERS

In the case of PMB, the arrangement of 5 methyl groups gives rise to 4 different PMB isomers. These are shown in Figure S5 for TS(3-4). Table S3 shows PBE-D3 energy differences of these isomers for the rate-determining step (i.e. step 3-4). Structures of the investigated tetramethylbenzenes (TMBs) were taken from the most stable PMB isomer – iso 1.

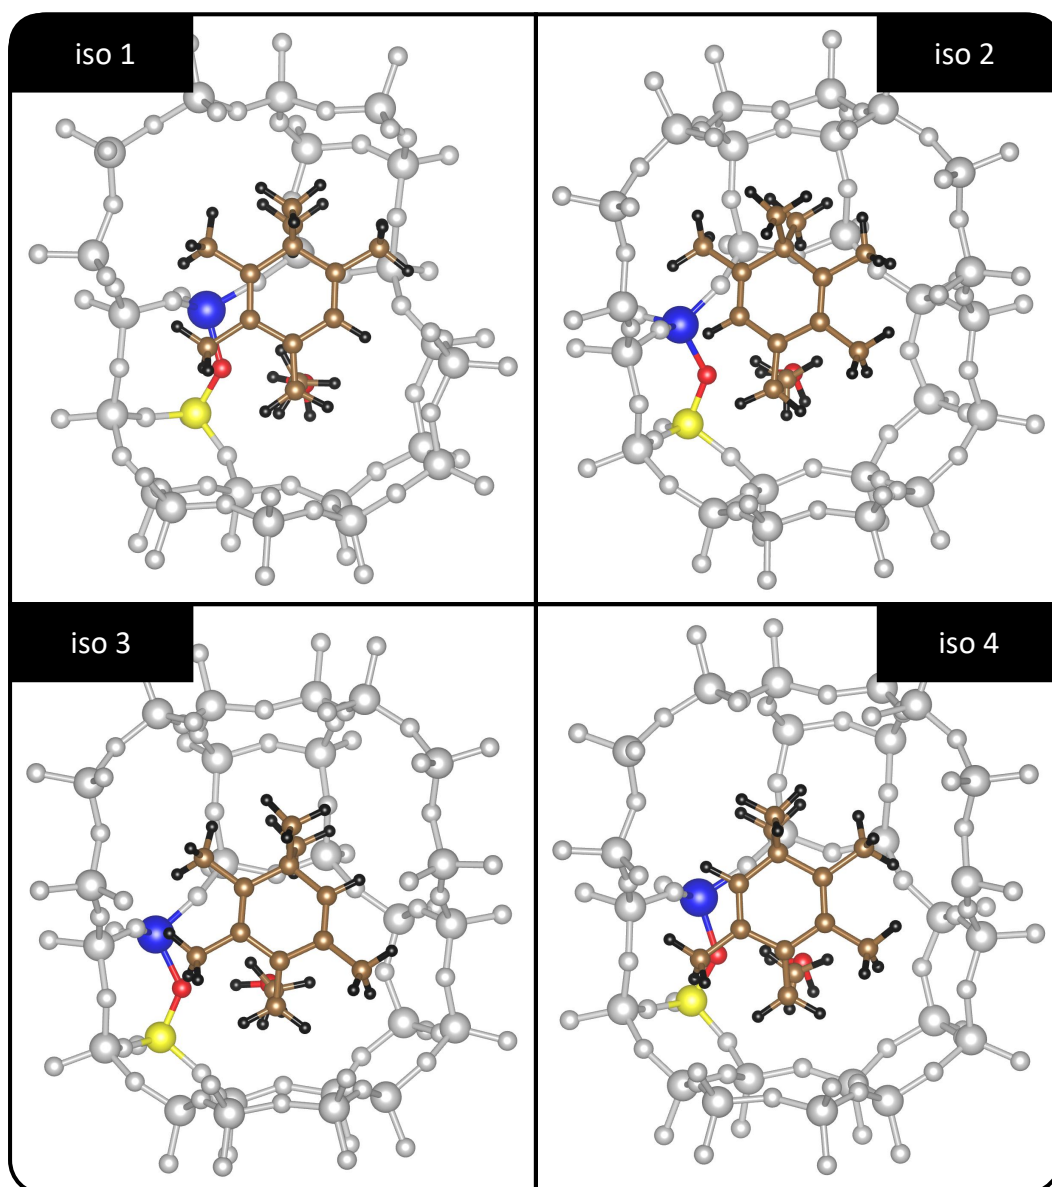

**Figure S5.** Transition state of step 3-4 from the main text shown for all four considered PMB isomers. Only the active site with the corresponding PMB isomer is color distinguished – Al = blue, Si = yellow, O = red, C = brown, H = black – other atoms are greyed for better readability. For all these isomers, the gem-methylated site is in para position to the site that is being methylated.

**Table S3.** PBE-D3 energy differences ( $\Delta E_{\text{PBE-D3}}$ ) of the rate-determining step (step 3-4 from the main text) for all the four considered PMB isomers relative to the most stable of them. Energies are in kJ/mol.

| PMB isomer | $\Delta E_{\text{PBE-D3}}$ [kJ/mol] |
|------------|-------------------------------------|
| iso 1      | 0                                   |
| iso 2      | +10                                 |
| iso 3      | +7                                  |
| iso 4      | +5                                  |

## S 5 DIFFERENT GEM-METHYLATION POSITIONS

Three possible gem-methylation positions with respect to the site where the side-chain is going to be formed - ortho, meta and para - were considered. Their corresponding structures are shown in Figure S6. ZPE corrected energy differences at the PBE-D3 level of theory referenced to the most stable - para-position - are shown in Table S4.

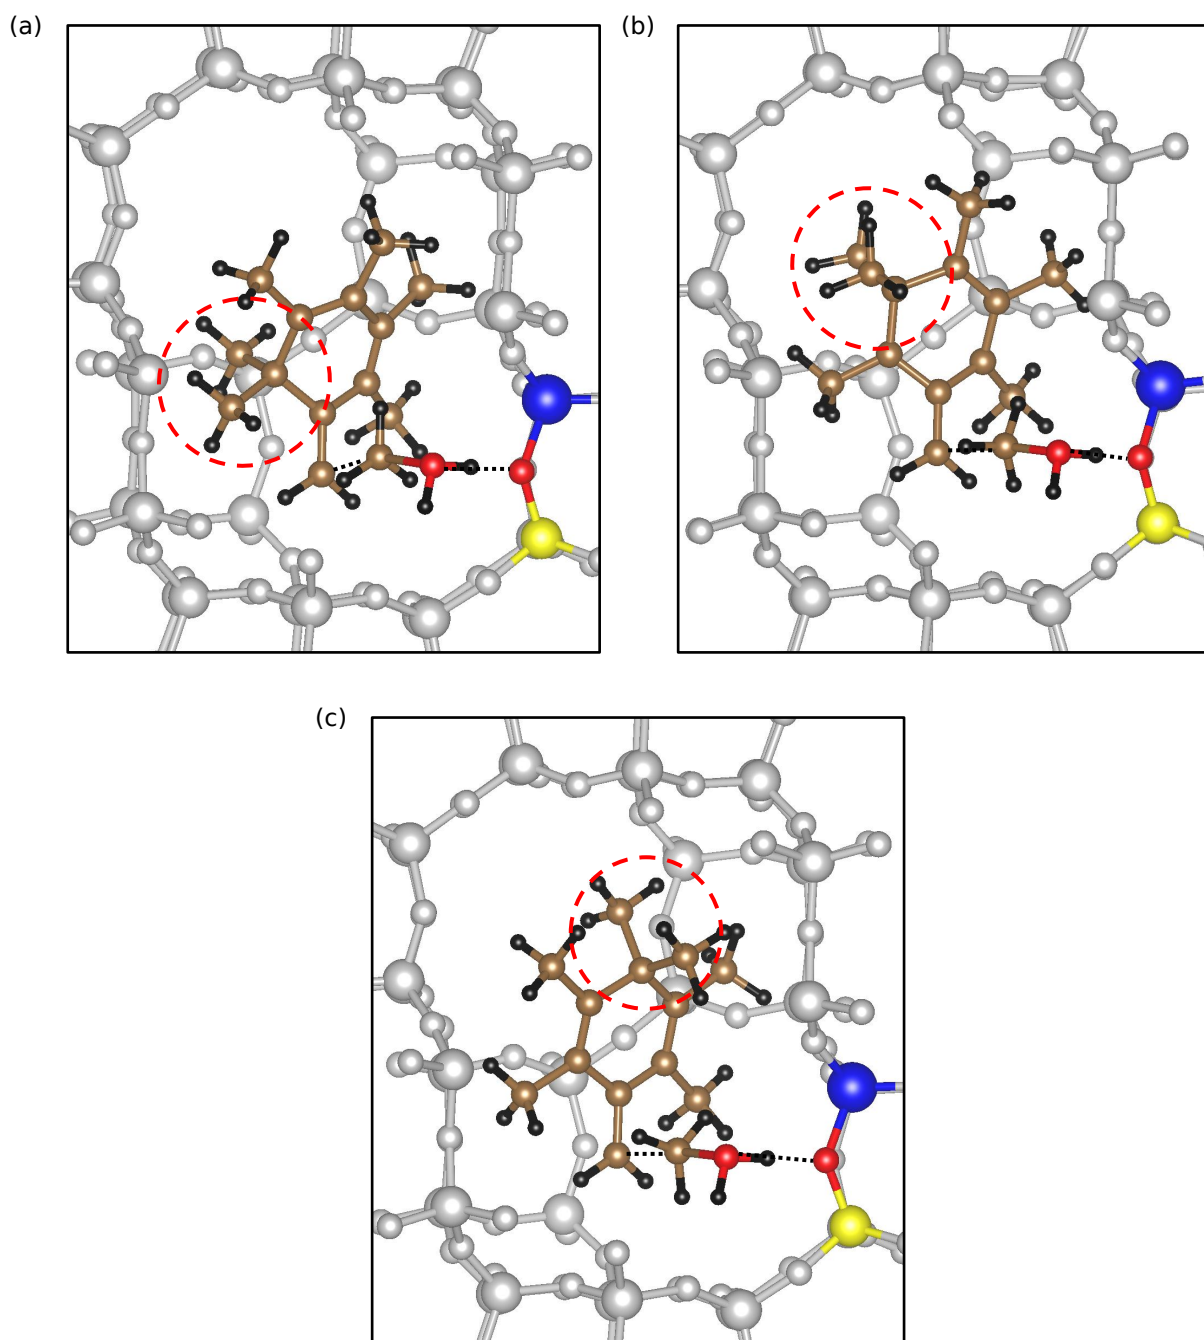

**Figure S6.** Considered possible gem-methylation positions - (a) ortho, (b) meta, and (c) para - with respect to the side-chain methylated site. The gem-methylated positions are highlighted by red dashed circle. Only the active site with the reactants are color-distinguished - red = O, blue = Al, yellow = Si, black = H, brown = C.

**Table S4.** PBE-D3 energy differences ( $\Delta E_{\text{PBE-D3}}$ ) and the Gibbs free energy differences - at the PBE-D3 level of theory ( $\Delta G_{\text{PBE-D3}}$ ) and cluster corrected ( $\Delta G$ ) - of the three considered gem-methylation positions referenced to the most stable of them. All values are in kJ/mol and ZPE corrected.

| gem-position | $\Delta E_{\text{PBE-D3}}$ [kJ/mol] | $\Delta G_{\text{PBE-D3}}$ [kJ/mol] | $\Delta G$ [kJ/mol] |
|--------------|-------------------------------------|-------------------------------------|---------------------|
| ortho        | 30                                  | 32                                  | 26                  |
| meta         | 131                                 | 112                                 | 140                 |
| para         | 0                                   | 0                                   | 0                   |

Observed high energy difference of the meta-position is due to the fact that the corresponding structure is not conjugated unlike those corresponding to the ortho- and para-positions.

## S 6 STEPWISE METHYLATIONS

The methylation of the first cross-conjugated intermediate (step 3-4) was also investigated proceeding via the stepwise mechanism. The corresponding PBE-D3 energies and the Gibbs free energies (at the PBE-D3 level of theory, and cluster corrected) are shown in Table S5 together with values for the concerted methylation from the main text. All these energies were obtained for 673 K, are in kJ/mol and are referenced to HMB\*. Numeric indices were taken from Figure 1(a) from the main text.

**Table S5. Energies at the PBE-D3 level of theory ( $\Delta E_{\text{PBE-D3}}$ ) and the Gibbs free energies - at the PBE-D3 level of theory ( $\Delta G_{\text{PBE-D3}}$ ) and cluster corrected ( $\Delta G$ ) - of the methylation of the first cross-conjugated intermediate. All energies are in kJ/mol, were obtained for 673 K and are referenced to HMB\*.**

| step <sup>a</sup> | $\Delta E_{\text{PBE-D3}}$ [kJ/mol] | $\Delta G_{\text{PBE-D3}}$ [kJ/mol] | $\Delta G$ [kJ/mol] |
|-------------------|-------------------------------------|-------------------------------------|---------------------|
| 3-4 (sw1)         | 56                                  | 204                                 | 214                 |
| 3-4 (sw2)         | 86                                  | 145                                 | 148                 |
| 3-4 (conc)        | 8                                   | 157                                 | 192                 |

<sup>a</sup> Used abbreviations: sw = stepwise methylation, sw1 = SMS formation, sw2 = methylation via SMS, conc = concerted methylation.

## S 7 COMPARISON WITH DATA FROM LITERATURE

Table S6 shows comparison of the energy span (i.e. the highest barrier versus the lowest energy state) of ethene production cycle of our work with those reported in literature

**Table S6. Comparison of energy ( $\Delta E$ ) and free energy ( $\Delta G$ ) spans without applied cluster corrections obtained in this work with results reported in literature. The corresponding sources are in the column "reference".**

| mol                 | $\Delta E$ [kJ/mol] | $\Delta G(400\text{ °C})$ [kJ/mol] | zeolite   | reference |
|---------------------|---------------------|------------------------------------|-----------|-----------|
| HMB                 | 70                  | 198                                | H-SSZ-13  | this work |
|                     | 147                 | 202                                | H-SAPO-34 | 5         |
| Durene <sup>a</sup> | 92                  | 177                                | H-SSZ-13  | this work |
|                     | 143                 | 196                                | H-SAPO-34 | 5         |
|                     | 131                 | 182                                | H-SSZ-13  | 5         |
|                     | 190                 | 235                                | H-ZSM-5   | 6         |

<sup>a</sup> Durene = 1,2,4,5-tetramethyl-benzene.

## S 8 TOTAL ENERGIES AND VIBRATIONS

Tables S7-9 summarize total energies of the used structures. Table S7 shows PBE-D3 total energies of periodic and cluster structures. Table S8 shows HF energies obtained for cc-pVXZ (where X is D, T or Q) basis set and Table S9 contains MP2 energies obtained for cc-pVDZ and cc-pVTZ basis set together with CCSD(T) using cc-pVDZ basis set. All energies given in eV. Table S10 shows lists of frequencies of the studied structures in  $\text{cm}^{-1}$ . Numerical indices were taken from Figure 1(a) from the main text.

**Table S7. Overview of periodic PBE energies, corresponding D3 contributions, 46T cluster PBE-D3 energies and ZPE corrections of the studied structures. Numerical indices taken from Figure 1(a) from the main text. All values are in eV.**

|                                | PBE       | D3     | ZPVE   | PBE-D3 46T  |
|--------------------------------|-----------|--------|--------|-------------|
| <i>empty zeolite</i>           |           |        |        |             |
| H-SSZ-13                       | -856.713  | -5.887 | 0.611  | -509092.873 |
| <i>gas phase</i>               |           |        |        |             |
| H2O                            | -14.224   | 0.000  | 0.574  | -2078.416   |
| MeOH                           | -30.221   | -0.015 | 1.362  | -3146.534   |
| ethene                         | -31.972   | -0.013 | 1.357  | -2136.159   |
| propene                        | -48.671   | -0.040 | 2.105  | -3204.972   |
| prehnitene                     | -142.382  | -0.296 | 5.567  | -10588.646  |
| isodurene                      | -142.462  | -0.285 | 5.558  | -10588.719  |
| durene                         | -142.526  | -0.287 | 5.568  | -10588.782  |
| PMB                            | -158.947  | -0.351 | 6.299  | -11657.360  |
| HMB                            | -175.328  | -0.418 | 7.021  | -12725.896  |
| <i>HMB mediated side-chain</i> |           |        |        |             |
| 1                              | -1030.816 | -8.081 | 7.759  | -521819.291 |
| 1-2                            |           |        |        |             |
| IS                             | -1061.901 | -8.607 | 9.153  | -524967.204 |
| TS                             | -1060.840 | -8.637 | 9.163  | -524966.087 |
| FS                             | -1061.470 | -8.581 | 9.169  | -524966.573 |
| 2                              | -1047.139 | -8.376 | 8.508  | -522887.792 |
| 2-3                            |           |        |        |             |
| IS                             | -1047.066 | -8.370 | 8.533  | -522887.688 |
| TS                             | -1046.096 | -8.414 | 8.411  | -522886.937 |
| FS                             | -1046.138 | -8.412 | 8.502  | -522887.000 |
| 3-4                            |           |        |        |             |
| IS                             | -1076.883 | -8.867 | 9.892  | -526034.548 |
| TS                             | -1076.169 | -8.889 | 9.906  | -526033.826 |
| FS                             | -1077.940 | -8.913 | 9.954  | -526035.511 |
| 3-4 (ortho)                    |           |        |        |             |
| TS                             | -1075.830 | -8.921 | 9.897  | -526033.434 |
| 3-4 (meta)                     |           |        |        |             |
| TS                             | -1074.859 | -8.845 | 9.808  | -526032.387 |
| 4-E1                           |           |        |        |             |
| IS                             | -1063.400 | -8.610 | 9.302  | -523956.341 |
| TS                             | -1062.620 | -8.605 | 9.264  | -523955.474 |
| FS                             | -1063.320 | -8.622 | 9.289  | -523956.207 |
| E1-E2                          |           |        |        |             |
| IS                             | -1063.318 | -8.622 | 9.293  | -523956.210 |
| TS                             | -1062.486 | -8.602 | 9.270  | -523955.310 |
| FS                             | -1063.044 | -8.639 | 9.323  | -523955.998 |
| E2-E3                          |           |        |        |             |
| IS                             | -1063.043 | -8.640 | 9.324  | -523955.998 |
| TS                             | -1062.553 | -8.618 | 9.274  | -523955.407 |
| FS                             | -1063.564 | -8.628 | 9.266  | -523956.551 |
| E3-1'                          |           |        |        |             |
| IS                             | -1063.592 | -8.647 | 9.268  | -523956.575 |
| TS                             | -1062.288 | -8.690 | 9.060  | -523955.497 |
| FS                             | -1063.008 | -8.649 | 9.173  | -523956.189 |
| 4-P1                           |           |        |        |             |
| IS                             | -1063.291 | -8.650 | 9.319  | -523956.247 |
| TS                             | -1061.441 | -8.713 | 9.181  | -523954.745 |
| FS                             | -1061.957 | -8.675 | 9.280  | -523955.214 |
| P1-P2                          |           |        |        |             |
| IS                             | -1092.706 | -9.173 | 10.695 | -527102.814 |

|                                           |     |           |           |        |             |             |
|-------------------------------------------|-----|-----------|-----------|--------|-------------|-------------|
|                                           | TS  | -1092.087 | -9.191    | 10.700 | -527102.160 |             |
|                                           | FS  | -1093.782 | -9.151    | 10.686 | -527103.670 |             |
| P2-P3                                     | IS  | -1079.389 | -8.937    | 10.057 | -525024.800 |             |
|                                           | TS  | -1078.492 | -8.889    | 10.003 | -525023.767 |             |
|                                           | FS  | -1079.418 | -8.917    | 10.020 | -525024.733 |             |
| P3-P4                                     | IS  | -1079.354 | -8.917    | 10.055 | -525024.629 |             |
|                                           | TS  | -1078.456 | -8.894    | 10.050 | -525023.678 |             |
|                                           | FS  | -1079.041 | -8.926    | 10.090 | -525024.385 |             |
| P4-P5                                     | IS  | -1079.048 | -8.951    | 10.101 | -525024.407 |             |
|                                           | TS  | -1078.412 | -8.902    | 10.037 | -525023.699 |             |
|                                           | FS  | -1079.492 | -8.912    | 10.041 | -525024.878 |             |
| P5-1'                                     | IS  | -1079.524 | -8.926    | 10.044 | -525024.880 |             |
|                                           | TS  | -1078.732 | -8.987    | 9.862  | -525024.291 |             |
|                                           | FS  | -1079.041 | -8.994    | 9.970  | -525024.670 |             |
| <b>PMB and TMBs mediated methylations</b> |     |           |           |        |             |             |
| <b>prehnitene</b>                         |     |           |           |        |             |             |
|                                           | 1   | -998.854  | -7.576    | 6.223  | -519682.596 |             |
|                                           | 3-4 | TS        | -1044.089 | -8.379 | 8.356       | -523896.960 |
| <b>isodurene</b>                          |     |           |           |        |             |             |
|                                           | 1   | -998.797  | -7.561    | 6.226  | -519682.551 |             |
|                                           | 3-4 | TS        | -1043.965 | -8.408 | 8.391       | -523896.876 |
| <b>durene</b>                             |     |           |           |        |             |             |
|                                           | 1   | -999.125  | -7.560    | 6.212  | -519682.859 |             |
|                                           | 1-2 | TS        | -1029.099 | -8.101 | 7.611       | -522829.628 |
|                                           | 2   | -1015.274 | -7.838    | 6.962  | -520751.211 |             |
|                                           | 3-4 | TS        | -1044.424 | -8.367 | 8.346       | -523897.294 |
|                                           | 4   | -1031.423 | -8.104    | 7.744  | -521819.669 |             |
| <b>PMB</b>                                |     |           |           |        |             |             |
|                                           | 1   | -1015.214 | -7.841    | 6.982  | -520751.343 |             |
|                                           | 1-2 | TS        | -1045.123 | -8.372 | 8.372       | -523898.018 |
|                                           | 2   | -1031.375 | -8.099    | 7.726  | -521819.588 |             |
|                                           | 3-4 | IS        | -1061.207 | -8.614 | 9.115       | -524966.468 |
|                                           |     | TS        | -1060.416 | -8.663 | 9.122       | -524965.652 |
|                                           |     | FS        | -1062.152 | -8.632 | 9.167       | -524967.270 |
|                                           | 4   | -1047.655 | -8.381    | 8.507  | -522888.225 |             |
| <b>stepwise methylation of 3-4</b>        |     |           |           |        |             |             |
| <b>SMS formation</b>                      |     |           |           |        |             |             |
|                                           | IS  | -1076.410 | -8.911    | 9.945  | -526033.795 |             |
|                                           | TS  | -1075.658 | -8.903    | 9.901  | -526033.337 |             |
|                                           | FS  | -1076.234 | -8.904    | 9.924  | -526034.018 |             |
| <b>methylation</b>                        |     |           |           |        |             |             |
|                                           | IS  | -1061.883 | -8.627    | 9.297  | -523955.085 |             |
|                                           | TS  | -1061.344 | -8.682    | 9.250  | -523954.564 |             |
|                                           | FS  | -1063.269 | -8.643    | 9.330  | -523956.259 |             |

**Table S8. Overview of HF energies of the studied structures. Numerical indices taken from Figure 1(a) from the main text. All values are in eV.**

|                      | HF/cc-pVDZ  | HF/cc-pVTZ  | HF/cc-pVQZ  |
|----------------------|-------------|-------------|-------------|
| <b>empty zeolite</b> |             |             |             |
| H-SSZ-13             | -507910.355 | -508017.027 | -508040.639 |
| <b>gas phase</b>     |             |             |             |
| H2O                  | -2068.762   | -2069.584   | -2069.792   |



|                                |             |    |             |             |             |
|--------------------------------|-------------|----|-------------|-------------|-------------|
|                                | MeOH        |    | -3130.617   | -3131.699   | -3131.956   |
|                                | ethene      |    | -2123.570   | -2124.205   | -2124.350   |
|                                | propene     |    | -3185.959   | -3186.870   | -3187.079   |
|                                | prehnitene  |    | -10527.204  | -10529.838  | -10530.478  |
|                                | isodurene   |    | -10527.354  | -10529.988  | -10530.632  |
|                                | durene      |    | -10527.423  | -10530.060  | -10530.699  |
|                                | PMB         |    | -11589.446  | -11592.352  | -11593.061  |
|                                | HMB         |    | -12651.416  | -12654.593  | -12655.370  |
| <b>HMB mediated side-chain</b> |             |    |             |             |             |
|                                | 1           |    | -520560.646 | -520669.957 | -520694.132 |
|                                | 1-2         | IS | -523691.919 | -523801.801 | -523826.108 |
|                                |             | TS | -523690.434 | -523800.177 | -523824.481 |
|                                |             | FS | -523691.437 | -523801.229 | -523825.551 |
|                                | 2           |    | -521622.528 | -521731.590 | -521755.748 |
|                                | 2-3         | IS | -521622.383 | -521731.532 | -521755.722 |
|                                |             | TS | -521620.934 | -521730.183 | -521754.369 |
|                                |             | FS | -521621.343 | -521730.777 | -521754.986 |
|                                | 3-4         | IS | -524752.604 | -524862.767 | -524887.125 |
|                                |             | TS | -524751.514 | -524861.561 | -524885.912 |
|                                |             | FS | -524753.798 | -524863.707 | -524888.055 |
|                                | 3-4 (ortho) | TS | -524751.058 | -524861.175 | -524885.544 |
|                                | 3-4 (meta)  | TS | -524749.206 | -524859.413 | -524883.796 |
|                                | 4-E1        | IS | -522684.456 | -522793.797 | -522818.016 |
|                                |             | TS | -522683.283 | -522792.620 | -522816.835 |
|                                |             | FS | -522684.301 | -522793.660 | -522817.899 |
|                                | E1-E2       | IS | -522684.309 | -522793.657 | -522817.896 |
|                                |             | TS | -522683.049 | -522792.387 | -522816.591 |
|                                |             | FS | -522684.039 | -522793.345 | -522817.564 |
|                                | E2-E3       | IS | -522684.040 | -522793.349 | -522817.568 |
|                                |             | TS | -522683.241 | -522792.517 | -522816.711 |
|                                |             | FS | -522684.604 | -522793.982 | -522818.187 |
|                                | E3-1'       | IS | -522684.642 | -522793.972 | -522818.183 |
|                                |             | TS | -522682.706 | -522792.119 | -522816.326 |
|                                |             | FS | -522684.159 | -522793.953 | -522818.190 |
|                                | 4-P1        | IS | -522684.277 | -522793.759 | -522817.995 |
|                                |             | TS | -522681.955 | -522791.266 | -522815.478 |
|                                |             | FS | -522683.193 | -522792.979 | -522817.254 |
|                                | P1-P2       | IS | -525814.135 | -525924.420 | -525948.832 |
|                                |             | TS | -525813.123 | -525923.372 | -525947.755 |
|                                |             | FS | -525815.328 | -525925.600 | -525950.000 |
|                                | P2-P3       | IS | -523746.275 | -523855.832 | -523880.082 |
|                                |             | TS | -523744.923 | -523854.465 | -523878.695 |
|                                |             | FS | -523746.111 | -523855.700 | -523879.973 |
|                                | P3-P4       | IS | -523746.015 | -523855.536 | -523879.804 |
|                                |             | TS | -523744.714 | -523854.223 | -523878.474 |
|                                |             | FS | -523745.727 | -523855.177 | -523879.440 |
|                                | P4-P5       | IS | -523745.824 | -523855.243 | -523879.498 |
|                                |             | TS | -523744.812 | -523854.191 | -523878.404 |
|                                |             | FS | -523746.192 | -523855.656 | -523879.907 |
|                                | P5-1'       | IS | -523746.108 | -523855.576 | -523879.822 |

|                                           |     |             |             |             |
|-------------------------------------------|-----|-------------|-------------|-------------|
|                                           | TS  | -523744.999 | -523854.677 | -523878.924 |
|                                           | FS  | -523745.723 | -523855.633 | -523879.906 |
| <b>PMB and TMBs mediated methylations</b> |     |             |             |             |
| <b>prehnitene</b>                         |     |             |             |             |
|                                           | 1   | -518437.400 | -518546.416 | -518570.512 |
|                                           | 3-4 | TS          | -522628.116 | -522737.902 |
|                                           |     |             |             | -522762.199 |
| <b>isodurene</b>                          |     |             |             |             |
|                                           | 1   | -518437.432 | -518546.340 | -518570.430 |
|                                           | 3-4 | TS          | -522628.022 | -522737.783 |
|                                           |     |             |             | -522762.067 |
| <b>durene</b>                             |     |             |             |             |
|                                           | 1   | -518437.737 | -518546.791 | -518570.882 |
|                                           | 1-2 | TS          | -521567.564 | -521677.005 |
|                                           |     |             |             | -521701.235 |
|                                           | 2   | -519499.576 | -519608.300 | -519632.384 |
|                                           | 3-4 | TS          | -522628.547 | -522738.354 |
|                                           |     |             |             | -522762.652 |
|                                           | 4   | -520561.450 | -520670.418 | -520694.545 |
| <b>PMB</b>                                |     |             |             |             |
|                                           | 1   | -519499.343 | -519608.381 | -519632.484 |
|                                           | 1-2 | TS          | -522629.177 | -522738.739 |
|                                           |     |             |             | -522763.018 |
|                                           | 2   | -520561.153 | -520670.077 | -520694.198 |
|                                           | 3-4 | IS          | -523691.350 | -523801.316 |
|                                           |     |             |             | -523825.642 |
|                                           |     | TS          | -523690.076 | -523800.083 |
|                                           |     |             |             | -523824.408 |
|                                           |     | FS          | -523692.364 | -523802.297 |
|                                           |     |             |             | -523826.627 |
|                                           | 4   | -521623.151 | -521732.410 | -521756.580 |
| <b>stepwise methylation of 3-4</b>        |     |             |             |             |
| <b>SMS formation</b>                      |     |             |             |             |
|                                           | IS  | -524751.850 | -524861.745 | -524886.082 |
|                                           | TS  | -524751.454 | -524861.369 | -524885.720 |
|                                           | FS  | -524752.339 | -524862.508 | -524886.854 |
| <b>methylation</b>                        |     |             |             |             |
|                                           | IS  | -522683.278 | -522792.889 | -522817.122 |
|                                           | TS  | -522682.133 | -522791.682 | -522815.927 |
|                                           | FS  | -522684.300 | -522793.716 | -522817.931 |

**Table S9. Overview of MP2 and CCSD(T) energies of the studied structures. Numerical indices taken from Figure 1(a) from the main text. All values are in eV.**

|                                |            | MP2/cc-pVDZ | MP2/cc-pVTZ | CCSD(T)/cc-pVDZ |
|--------------------------------|------------|-------------|-------------|-----------------|
| <b>empty zeolite</b>           |            |             |             |                 |
|                                | H-SSZ-13   | -508366.308 | -508599.699 | -508388.189     |
| <b>gas phase</b>               |            |             |             |                 |
|                                | H2O        | -2074.278   | -2076.729   | -2074.624       |
|                                | MeOH       | -3139.856   | -3143.376   | -3140.748       |
|                                | ethene     | -2131.059   | -2133.344   | -2132.147       |
|                                | propene    | -3197.339   | -3200.748   | -3198.889       |
|                                | prehnitene | -10564.590  | -10575.186  | -10568.379      |
|                                | isodurene  | -10564.667  | -10575.254  | -10568.468      |
|                                | durene     | -10564.730  | -10575.319  | -10568.523      |
|                                | PMB        | -11630.853  | -11642.570  | -11635.090      |
|                                | HMB        | -12696.935  | -12709.790  | -12701.615      |
| <b>HMB mediated side-chain</b> |            |             |             |                 |
|                                | 1          | -521064.088 | -521310.035 | -521090.585     |
|                                | 1-2        | IS          | -524205.677 | -524454.763     |
|                                |            |             |             | -524232.958     |
|                                |            | TS          | -524204.368 | -524453.383     |
|                                |            |             |             | -524231.624     |

|             |    |             |             |             |
|-------------|----|-------------|-------------|-------------|
|             | FS | -524204.841 | -524453.864 | -524232.245 |
| 2           |    | -522130.140 | -522376.774 | -522157.212 |
| 2-3         | IS | -522129.959 | -522376.675 | -522157.045 |
|             | TS | -522129.162 | -522375.946 | -522156.229 |
|             | FS | -522129.295 | -522376.221 | -522156.420 |
| 3-4         | IS | -525270.465 | -525520.683 | -525298.428 |
|             | TS | -525269.480 | -525519.659 | -525297.402 |
|             | FS | -525271.470 | -525521.518 | -525299.331 |
| 3-4 (ortho) | TS | -525269.081 | -525519.326 | -525296.987 |
| 3-4 (meta)  | TS | -525267.854 | -525518.134 | -525295.570 |
| 4-E1        | IS | -523196.202 | -523443.991 | -523223.742 |
|             | TS | -523195.518 | -523443.329 | -523222.869 |
|             | FS | -523196.036 | -523443.848 | -523223.585 |
| E1-E2       | IS | -523196.048 | -523443.846 | -523223.597 |
|             | TS | -523195.375 | -523443.205 | -523222.716 |
|             | FS | -523195.958 | -523443.754 | -523223.464 |
| E2-E3       | IS | -523195.955 | -523443.754 | -523223.460 |
|             | TS | -523195.544 | -523443.331 | -523222.902 |
|             | FS | -523196.355 | -523444.187 | -523223.884 |
| E3-1'       | IS | -523196.459 | -523444.228 | -523223.978 |
|             | TS | -523195.211 | -523443.124 | -523222.543 |
|             | FS | -523195.940 | -523444.129 | -523223.407 |
| 4-P1        | IS | -523196.007 | -523443.955 | -523223.548 |
|             | TS | -523194.642 | -523442.428 | -523222.176 |
|             | FS | -523195.029 | -523443.228 | -523222.676 |
| P1-P2       | IS | -526336.360 | -526587.638 | -526364.759 |
|             | TS | -526335.405 | -526586.709 | -526363.762 |
|             | FS | -526337.062 | -526588.341 | -526365.403 |
| P2-P3       | IS | -524262.266 | -524511.159 | -524290.287 |
|             | TS | -524261.379 | -524510.294 | -524289.218 |
|             | FS | -524262.154 | -524511.036 | -524290.153 |
| P3-P4       | IS | -524262.113 | -524510.973 | -524290.126 |
|             | TS | -524261.369 | -524510.276 | -524289.170 |
|             | FS | -524261.972 | -524510.812 | -524289.956 |
| P4-P5       | IS | -524262.042 | -524510.874 | -524290.043 |
|             | TS | -524261.553 | -524510.327 | -524289.358 |
|             | FS | -524262.394 | -524511.227 | -524290.341 |
| P5-1'       | IS | -524262.488 | -524511.299 | -524290.400 |
|             | TS | -524261.445 | -524510.537 | -524289.302 |
|             | FS | -524262.099 | -524511.327 | -524289.955 |

***PMB and TMBs mediated methylations***

|            |     |    |             |             |             |
|------------|-----|----|-------------|-------------|-------------|
| prehnitene |     |    |             |             |             |
|            | 1   |    | -518932.084 | -519175.904 | -518957.724 |
|            | 3-4 | TS | -523137.243 | -523385.311 | -523164.310 |
| isodurene  |     |    |             |             |             |
|            | 1   |    | -518932.123 | -519175.838 | -518957.770 |
|            | 3-4 | TS | -523137.184 | -523385.260 | -523164.254 |
| durene     |     |    |             |             |             |
|            | 1   |    | -518932.295 | -519176.091 | -518957.937 |
|            | 1-2 | TS | -522072.563 | -522319.391 | -522098.979 |

|                                           |     |             |             |             |             |
|-------------------------------------------|-----|-------------|-------------|-------------|-------------|
| PMB                                       | 2   |             | -519998.276 | -520242.659 | -520024.517 |
|                                           | 3-4 | TS          | -523137.492 | -523385.557 | -523164.580 |
|                                           | 4   |             | -521064.258 | -521309.814 | -521090.959 |
|                                           | 1   |             | -519998.553 | -520243.284 | -520024.610 |
|                                           | 1-2 | TS          | -523138.644 | -523386.538 | -523165.502 |
|                                           | 2   |             | -521064.239 | -521309.785 | -521090.902 |
|                                           | 3-4 | IS          | -524204.760 | -524453.826 | -524232.306 |
|                                           |     | TS          | -524203.531 | -524452.720 | -524231.034 |
|                                           |     | FS          | -524205.385 | -524454.509 | -524232.840 |
|                                           | 4   |             | -522130.342 | -522377.128 | -522157.471 |
| <b><i>stepwise methylation of 3-4</i></b> |     |             |             |             |             |
| SMS formation                             | IS  | -525269.872 | -525519.869 | -525297.804 |             |
|                                           | TS  | -525269.244 | -525519.307 | -525297.273 |             |
|                                           | FS  | -525270.028 | -525520.262 | -525298.027 |             |
| methylation                               | IS  | -523195.032 | -523443.020 | -523222.731 |             |
|                                           | TS  | -523194.228 | -523442.224 | -523221.868 |             |
|                                           | FS  | -523196.107 | -523443.968 | -523223.629 |             |

Table S10. Frequencies of the studied structures.

|                                                  |                  | list of frequencies [cm <sup>-1</sup> ]                                                                                                                                                                                                                                                                                                                                                                                                                                                                                                                                                                                                                                                                                                                                                   |
|--------------------------------------------------|------------------|-------------------------------------------------------------------------------------------------------------------------------------------------------------------------------------------------------------------------------------------------------------------------------------------------------------------------------------------------------------------------------------------------------------------------------------------------------------------------------------------------------------------------------------------------------------------------------------------------------------------------------------------------------------------------------------------------------------------------------------------------------------------------------------------|
| <i>empty zeolite</i>                             |                  |                                                                                                                                                                                                                                                                                                                                                                                                                                                                                                                                                                                                                                                                                                                                                                                           |
|                                                  | H-SSZ-13         | 245.5, 286.5, 294.1, 354.6, 510.7, 601.9, 628.6, 701.2, 722.7, 779.2, 1029.4, 3701.6                                                                                                                                                                                                                                                                                                                                                                                                                                                                                                                                                                                                                                                                                                      |
| <i>gas phase (first 6 frequencies discarded)</i> |                  |                                                                                                                                                                                                                                                                                                                                                                                                                                                                                                                                                                                                                                                                                                                                                                                           |
|                                                  | H <sub>2</sub> O | 1577.2, 3698.9, 3814.2                                                                                                                                                                                                                                                                                                                                                                                                                                                                                                                                                                                                                                                                                                                                                                    |
|                                                  | MeOH             | 298.0, 1010.5, 1056.2, 1128.0, 1325.3, 1419.6, 1439.8, 1452.0, 2918.7, 2970.1, 3043.7, 3728.1                                                                                                                                                                                                                                                                                                                                                                                                                                                                                                                                                                                                                                                                                             |
|                                                  | ethene           | 808.9, 936.2, 939.2, 1034.5, 1199.3, 1342.0, 1420.9, 1638.2, 3051.2, 3065.2, 3124.3, 3153.8                                                                                                                                                                                                                                                                                                                                                                                                                                                                                                                                                                                                                                                                                               |
|                                                  | propene          | 199.8, 417.5, 570.8, 898.6, 912.9, 914.4, 989.9, 1024.9, 1154.2, 1285.3, 1349.2, 1395.5, 1421.1, 1437.6, 1660.1, 2946.8, 2997.5, 3031.4, 3051.1, 3057.1, 3141.8                                                                                                                                                                                                                                                                                                                                                                                                                                                                                                                                                                                                                           |
|                                                  | prehnitene       | 44.9, 57.8, 121.0, 134.3, 186.4, 195.8, 259.7, 309.8, 314.5, 319.9, 393.9, 458.4, 474.3, 494.7, 501.0, 550.3, 636.8, 715.1, 720.5, 787.5, 844.2, 907.1, 919.0, 965.9, 981.6, 982.6, 1001.7, 1023.1, 1023.8, 1051.2, 1056.6, 1159.3, 1195.4, 1240.7, 1248.1, 1320.2, 1346.6, 1353.1, 1359.0, 1367.8, 1392.7, 1416.8, 1417.9, 1422.6, 1433.5, 1437.8, 1443.0, 1450.6, 1460.7, 1462.0, 1577.4, 1597.4, 2946.8, 2947.9, 2953.5, 2955.5, 2993.3, 2994.7, 2999.0, 3001.7, 3041.2, 3042.5, 3068.7, 3075.2, 3080.6, 3093.7                                                                                                                                                                                                                                                                        |
|                                                  | isodurene        | 36.2, 46.2, 109.6, 161.2, 172.4, 189.1, 224.6, 271.2, 301.5, 315.8, 352.8, 448.4, 492.6, 509.7, 540.5, 543.6, 570.5, 704.1, 732.4, 834.1, 864.0, 890.4, 954.3, 971.9, 984.7, 998.4, 1001.1, 1014.2, 1015.6, 1025.5, 1061.5, 1135.2, 1199.5, 1236.3, 1291.3, 1328.3, 1351.1, 1354.9, 1356.2, 1362.1, 1396.3, 1410.5, 1419.3, 1430.4, 1431.7, 1436.8, 1443.0, 1450.3, 1456.1, 1475.9, 1574.2, 1606.7, 2945.0, 2949.4, 2950.8, 2952.8, 3001.1, 3002.0, 3011.3, 3016.3, 3039.5, 3040.9, 3042.4, 3050.9, 3068.0, 3070.0                                                                                                                                                                                                                                                                        |
|                                                  | durene           | 116.0, 136.0, 136.8, 150.6, 168.1, 188.8, 255.6, 281.9, 288.4, 301.5, 332.9, 425.1, 438.0, 500.4, 515.8, 577.2, 658.3, 703.4, 735.9, 805.0, 847.8, 856.4, 964.7, 973.6, 986.1, 994.7, 1003.3, 1015.3, 1023.5, 1028.6, 1068.4, 1184.4, 1188.6, 1259.7, 1271.7, 1329.6, 1348.3, 1350.4, 1361.5, 1362.6, 1378.6, 1419.3, 1421.1, 1427.9, 1434.4, 1436.2, 1438.1, 1445.0, 1453.7, 1493.7, 1559.0, 1617.5, 2945.7, 2947.2, 2948.2, 2949.3, 2992.6, 2993.7, 2998.2, 2999.2, 3040.0, 3041.6, 3042.2, 3044.4, 3064.7, 3067.3                                                                                                                                                                                                                                                                      |
|                                                  | PMB              | 63.9, 92.6, 109.0, 117.6, 138.5, 170.1, 172.0, 195.3, 286.2, 295.3, 326.3, 339.3, 344.0, 378.2, 439.2, 481.0, 520.7, 546.4, 565.9, 570.6, 678.8, 713.4, 798.4, 843.5, 887.4, 966.3, 974.7, 975.6, 992.4, 998.2, 1011.7, 1020.6, 1024.4, 1056.3, 1063.0, 1065.8, 1208.7, 1228.6, 1291.7, 1321.9, 1349.7, 1350.9, 1353.3, 1356.8, 1362.1, 1390.5, 1410.2, 1415.3, 1422.3, 1424.0, 1435.2, 1443.6, 1445.2, 1449.9, 1454.8, 1464.4, 1474.7, 1568.2, 1598.3, 2946.5, 2948.7, 2949.9, 2951.3, 2951.7, 3000.0, 3001.6, 3003.9, 3004.5, 3013.3, 3038.9, 3039.3, 3061.3, 3062.4, 3065.8, 3069.0                                                                                                                                                                                                    |
|                                                  | HMB              | 57.2, 61.8, 65.9, 71.4, 75.5, 77.6, 124.2, 131.8, 168.6, 191.4, 333.9, 335.6, 341.7, 342.9, 393.4, 395.9, 434.3, 445.6, 446.8, 549.3, 568.4, 568.8, 573.3, 584.9, 720.3, 795.1, 795.6, 954.8, 955.5, 965.1, 965.3, 989.2, 990.2, 1018.2, 1019.4, 1025.7, 1043.8, 1044.6, 1063.7, 1064.3, 1070.8, 1235.0, 1303.2, 1315.9, 1347.7, 1348.5, 1352.2, 1354.9, 1355.6, 1363.0, 1397.7, 1397.9, 1413.2, 1414.1, 1420.5, 1427.8, 1438.7, 1439.3, 1440.1, 1455.5, 1455.9, 1464.6, 1466.5, 1479.3, 1571.4, 1571.6, 2942.8, 2943.3, 2944.0, 2944.3, 2945.2, 2945.8, 3016.8, 3018.5, 3019.3, 3023.6, 3023.9, 3027.5, 3045.2, 3049.8, 3050.8, 3056.2, 3057.1, 3059.1                                                                                                                                   |
| <i>HMB mediated side-chain</i>                   |                  |                                                                                                                                                                                                                                                                                                                                                                                                                                                                                                                                                                                                                                                                                                                                                                                           |
| 1                                                |                  | 40.7, 52.0, 56.0, 85.0, 86.4, 103.0, 110.2, 127.3, 131.8, 156.8, 168.8, 177.7, 186.3, 193.5, 209.3, 226.9, 241.1, 284.8, 291.6, 329.5, 337.3, 344.9, 352.9, 355.5, 374.2, 413.3, 436.2, 453.5, 463.9, 511.4, 563.6, 570.5, 571.5, 573.0, 588.9, 601.3, 619.8, 703.5, 720.2, 721.6, 782.8, 806.6, 813.0, 951.1, 968.8, 978.6, 983.0, 992.8, 1003.4, 1018.1, 1031.3, 1033.5, 1033.6, 1050.2, 1072.3, 1073.5, 1080.0, 1101.7, 1252.7, 1329.7, 1335.9, 1349.1, 1349.9, 1355.3, 1356.4, 1359.2, 1366.3, 1407.1, 1408.4, 1415.3, 1418.7, 1429.4, 1431.5, 1435.3, 1445.6, 1454.5, 1457.3, 1463.0, 1469.3, 1470.0, 1470.6, 1582.0, 1599.5, 2943.5, 2945.2, 2973.6, 2973.9, 2976.6, 2979.7, 3016.6, 3017.4, 3022.6, 3025.8, 3034.2, 3037.6, 3060.1, 3061.6, 3146.9, 3154.0, 3183.2, 3188.1, 3695.9 |
| 1-2                                              | IS               | 39.4, 60.3, 73.9, 91.0, 92.8, 95.2, 103.0, 109.1, 118.3, 120.3, 132.8, 141.8, 149.6, 161.4, 169.2, 173.1, 178.9, 192.4, 195.0, 215.6, 229.8, 247.1, 281.2, 329.2, 331.9, 346.0, 351.6, 353.1, 372.4, 416.6, 437.8, 454.5, 462.1, 466.6, 565.8, 570.8, 571.4, 572.3, 574.2, 596.0, 601.1, 626.0, 684.5, 701.7, 722.5, 758.6, 807.0, 814.1, 858.9, 951.4, 955.4, 969.4, 977.7, 983.1, 994.6, 1004.7, 1019.9, 1032.0, 1034.8, 1050.3, 1070.5, 1073.0, 1074.2, 1080.9, 1090.9, 1101.5, 1149.0, 1253.7, 1325.3, 1328.7, 1336.6, 1350.1, 1351.9, 1356.3, 1358.1, 1361.2, 1365.5, 1368.2, 1405.7, 1407.2, 1415.0, 1417.4, 1426.8, 1428.3, 1431.1, 1435.5, 1440.3, 1443.4, 1445.7, 1453.4, 1457.6, 1463.4, 1468.4, 1469.4, 1471.3, 1579.8, 1580.4, 1597.6, 2942.5, 2947.5,                        |

|     |    |                                                                                                                                                                                                                                                                                                                                                                                                                                                                                                                                                                                                                                                                                                                                                                                                                                                                                                                                  |
|-----|----|----------------------------------------------------------------------------------------------------------------------------------------------------------------------------------------------------------------------------------------------------------------------------------------------------------------------------------------------------------------------------------------------------------------------------------------------------------------------------------------------------------------------------------------------------------------------------------------------------------------------------------------------------------------------------------------------------------------------------------------------------------------------------------------------------------------------------------------------------------------------------------------------------------------------------------|
|     |    | 2973.0, 2975.6, 2984.0, 2985.9, 2994.2, 3020.6, 3023.1, 3023.6, 3027.2, 3040.6, 3042.1, 3063.6, 3065.2, 3092.4, 3115.0, 3135.0, 3162.2, 3177.6, 3192.5, 3333.1                                                                                                                                                                                                                                                                                                                                                                                                                                                                                                                                                                                                                                                                                                                                                                   |
| TS  |    | 365.5i, 45.6, 61.2, 72.8, 92.0, 97.1, 108.0, 111.7, 126.8, 138.1, 143.2, 155.6, 170.3, 172.5, 184.5, 188.6, 193.8, 206.9, 214.5, 227.3, 240.2, 256.5, 274.4, 302.2, 334.4, 336.4, 350.2, 357.5, 379.6, 388.5, 393.9, 414.1, 440.9, 451.0, 461.3, 513.6, 552.7, 553.2, 567.5, 567.8, 574.4, 579.8, 602.2, 637.7, 661.9, 682.0, 704.0, 719.9, 802.8, 814.5, 873.2, 937.2, 952.3, 958.0, 969.3, 975.6, 986.1, 993.2, 1005.9, 1016.7, 1019.7, 1025.4, 1033.0, 1054.1, 1074.8, 1077.7, 1081.8, 1101.8, 1106.9, 1259.5, 1316.0, 1335.4, 1342.6, 1348.7, 1352.5, 1353.4, 1360.9, 1362.8, 1366.2, 1370.3, 1388.8, 1401.7, 1408.2, 1416.7, 1424.0, 1430.1, 1435.6, 1441.1, 1450.8, 1456.1, 1458.6, 1464.5, 1470.9, 1472.7, 1544.3, 1590.3, 1614.4, 2956.3, 2958.4, 2980.0, 2987.2, 2989.3, 2998.7, 3013.4, 3029.6, 3032.2, 3042.9, 3048.0, 3051.5, 3069.4, 3077.7, 3105.0, 3146.1, 3170.5, 3173.4, 3196.4, 3204.0, 3237.2, 3267.6, 3568.6 |
| FS  |    | 30.5, 48.2, 62.1, 66.7, 80.3, 86.3, 89.2, 95.9, 108.6, 112.8, 133.9, 137.7, 147.2, 166.4, 173.3, 198.6, 238.4, 248.6, 256.0, 262.6, 267.4, 289.5, 301.4, 312.8, 321.5, 333.3, 345.5, 364.3, 365.1, 378.6, 392.1, 396.3, 414.8, 437.2, 445.4, 454.3, 535.3, 548.4, 552.9, 562.2, 568.7, 569.7, 598.0, 602.9, 646.4, 661.3, 679.2, 680.7, 772.7, 795.9, 836.6, 918.9, 944.3, 953.0, 961.8, 963.4, 976.5, 989.9, 993.5, 1012.4, 1017.0, 1034.2, 1046.7, 1054.0, 1075.1, 1083.1, 1087.6, 1111.0, 1213.3, 1257.8, 1321.6, 1326.9, 1334.7, 1336.3, 1343.3, 1355.2, 1359.4, 1371.3, 1377.0, 1399.0, 1400.2, 1406.2, 1417.6, 1422.8, 1424.2, 1430.4, 1434.1, 1443.8, 1447.4, 1448.8, 1451.7, 1462.9, 1469.0, 1487.7, 1523.0, 1599.2, 1615.8, 2967.1, 2968.2, 2968.6, 2976.3, 2988.0, 3004.6, 3018.3, 3021.3, 3031.4, 3035.0, 3037.5, 3043.9, 3086.7, 3091.9, 3096.3, 3101.1, 3146.2, 3148.0, 3187.5, 3210.1, 3232.7, 3537.1, 3732.1      |
| 2   |    | 20.8, 49.4, 61.9, 74.1, 82.8, 93.5, 106.0, 131.8, 154.6, 168.9, 175.4, 191.2, 197.5, 206.0, 208.2, 225.8, 254.2, 261.9, 285.8, 290.1, 300.6, 320.0, 331.0, 355.1, 363.2, 380.1, 382.9, 411.1, 429.0, 440.4, 466.8, 535.8, 540.7, 555.3, 567.4, 571.4, 591.6, 599.5, 634.4, 658.8, 677.7, 684.5, 785.4, 800.6, 849.3, 929.8, 936.1, 949.0, 954.4, 972.6, 984.0, 994.0, 998.3, 1020.4, 1029.2, 1039.2, 1069.6, 1075.8, 1080.9, 1093.1, 1094.9, 1107.0, 1213.2, 1263.5, 1323.2, 1330.0, 1333.7, 1344.6, 1348.2, 1358.1, 1359.7, 1365.7, 1374.1, 1384.9, 1397.5, 1400.1, 1414.6, 1417.7, 1422.4, 1424.7, 1427.2, 1435.3, 1448.3, 1454.2, 1459.6, 1459.9, 1467.5, 1486.1, 1525.2, 1591.5, 2948.7, 2970.3, 2976.1, 2988.7, 2990.5, 2995.6, 2996.3, 3018.7, 3034.2, 3047.0, 3054.6, 3057.7, 3077.0, 3084.4, 3084.5, 3085.7, 3103.1, 3159.1, 3169.1, 3173.7, 3194.6                                                                      |
| 2-3 | IS | 45.1, 58.4, 77.2, 84.9, 87.0, 98.1, 108.8, 123.8, 135.5, 163.9, 200.1, 212.9, 225.8, 247.2, 255.5, 260.0, 277.8, 287.1, 297.9, 303.7, 309.3, 333.9, 343.1, 363.8, 366.8, 381.6, 390.9, 422.3, 432.3, 448.4, 469.5, 537.3, 540.7, 560.8, 565.0, 574.9, 589.9, 595.8, 636.8, 660.7, 676.3, 687.2, 784.1, 799.4, 851.4, 931.4, 938.7, 946.5, 954.0, 965.7, 978.5, 991.5, 997.5, 1019.7, 1027.6, 1035.4, 1067.4, 1071.7, 1077.0, 1087.7, 1092.0, 1111.8, 1213.8, 1265.4, 1318.6, 1328.5, 1334.7, 1347.4, 1350.7, 1357.4, 1363.3, 1368.6, 1374.7, 1380.4, 1398.2, 1404.2, 1416.5, 1421.3, 1424.3, 1425.2, 1428.9, 1436.8, 1439.0, 1443.3, 1458.0, 1459.9, 1468.1, 1489.1, 1520.9, 1594.7, 2947.2, 2971.1, 2978.8, 2981.9, 2982.7, 2988.7, 2990.6, 3011.9, 3032.4, 3039.2, 3044.6, 3046.6, 3067.9, 3078.7, 3083.4, 3095.4, 3096.4, 3179.4, 3194.7, 3214.4, 3218.4                                                                      |
|     | TS | 716.6i, 55.3, 71.0, 78.5, 89.8, 99.5, 106.9, 148.4, 157.8, 180.7, 207.9, 226.2, 230.4, 262.4, 273.8, 275.6, 283.7, 295.9, 325.3, 329.5, 338.6, 346.6, 352.2, 362.8, 367.8, 394.4, 402.2, 432.7, 457.5, 465.6, 509.2, 550.7, 553.3, 570.0, 584.0, 598.1, 604.0, 624.7, 632.7, 654.8, 672.2, 710.5, 737.1, 781.7, 795.4, 868.9, 899.0, 921.5, 933.7, 958.3, 969.6, 982.5, 995.9, 1004.8, 1011.4, 1026.6, 1032.2, 1069.2, 1074.0, 1078.3, 1095.6, 1110.9, 1131.8, 1144.8, 1211.4, 1269.8, 1284.0, 1339.9, 1346.2, 1346.8, 1356.2, 1358.8, 1364.4, 1369.1, 1380.8, 1396.3, 1416.1, 1417.5, 1425.7, 1431.3, 1433.3, 1437.7, 1440.7, 1444.7, 1451.0, 1454.3, 1465.9, 1472.5, 1522.5, 1572.3, 1641.3, 2968.7, 2970.2, 2974.9, 2975.0, 2976.0, 2979.8, 3019.8, 3023.5, 3030.0, 3042.2, 3048.7, 3054.1, 3062.7, 3076.9, 3079.6, 3133.3, 3137.5, 3144.0, 3211.1, 3215.6                                                                    |
|     | FS | 58.9, 62.2, 80.9, 86.1, 96.3, 110.2, 132.7, 144.1, 163.2, 192.2, 201.3, 225.1, 256.2, 264.7, 265.5, 273.3, 290.1, 301.4, 324.9, 333.2, 340.8, 344.2, 352.9, 358.4, 367.9, 390.5, 403.5, 434.2, 455.0, 470.2, 545.8, 548.6, 549.0, 572.5, 588.7, 593.4, 612.3, 622.9, 661.2, 687.4, 709.9, 721.4, 765.1, 773.3, 792.0, 808.6, 831.7, 900.6, 918.2, 929.0, 956.8, 974.3, 981.3, 996.6, 1005.5, 1026.4, 1032.3, 1073.8, 1076.4, 1084.1, 1101.7, 1113.8, 1136.6, 1210.4, 1235.4, 1263.9, 1278.4, 1338.2, 1344.7, 1355.7, 1359.0, 1364.5, 1368.4, 1382.2, 1388.3, 1416.6, 1418.2, 1426.1, 1431.4, 1432.5, 1435.7, 1440.9, 1445.5, 1448.5, 1452.7, 1464.7, 1473.1, 1532.0, 1600.1, 1651.4, 2619.1, 2963.8, 2964.9, 2971.7, 2971.9, 2974.8, 2977.6, 3019.2, 3020.4, 3023.3, 3033.0, 3041.5, 3059.0, 3070.3, 3073.3, 3073.8, 3138.4, 3149.6, 3159.7, 3202.9, 3216.5                                                                      |
| 3-4 | IS | 35.7, 47.8, 56.7, 72.1, 73.8, 87.6, 93.9, 96.2, 109.2, 113.5, 115.4, 125.1, 135.6, 139.8, 152.4, 165.5, 174.4, 213.1, 230.8, 244.6, 246.0, 271.2, 272.9, 276.5, 324.9, 338.3, 344.1, 351.4, 364.7, 374.5, 394.9, 411.2, 436.1, 440.2, 455.0, 460.9, 560.8, 563.1, 570.3, 576.9, 578.8, 592.7, 609.8, 644.3, 689.9, 698.1, 704.7, 710.4, 739.0, 777.3, 785.7, 815.3, 854.5, 901.5, 902.6, 916.0, 948.8, 965.4, 966.3, 975.1, 991.8, 1004.2, 1020.8, 1029.7, 1066.7, 1068.3, 1075.7, 1082.8, 1089.2, 1101.1, 1118.0, 1130.8, 1174.6, 1199.0, 1207.3, 1262.7, 1294.8, 1334.0, 1343.7, 1347.7, 1354.2, 1357.2, 1364.8, 1370.1, 1389.7, 1405.2, 1418.1, 1423.5, 1428.1, 1429.4, 1430.5, 1437.8, 1438.1, 1440.2, 1442.0, 1448.0, 1453.7, 1460.3, 1462.2, 1468.1, 1475.2, 1568.2                                                                                                                                                        |

|             |    |                                                                                                                                                                                                                                                                                                                                                                                                                                                                                                                                                                                                                                                                                                                                                                                                                                                                                                                                                                                                     |
|-------------|----|-----------------------------------------------------------------------------------------------------------------------------------------------------------------------------------------------------------------------------------------------------------------------------------------------------------------------------------------------------------------------------------------------------------------------------------------------------------------------------------------------------------------------------------------------------------------------------------------------------------------------------------------------------------------------------------------------------------------------------------------------------------------------------------------------------------------------------------------------------------------------------------------------------------------------------------------------------------------------------------------------------|
|             |    | 1613.9, 1628.5, 1657.0, 2961.1, 2967.4, 2973.2, 2990.8, 2993.7, 3002.4, 3007.9, 3014.5, 3016.0, 3051.5, 3052.0, 3059.1, 3064.2, 3068.7, 3072.2, 3094.0, 3113.5, 3122.3, 3123.8, 3166.6, 3193.2, 3218.2, 3225.6, 3409.4                                                                                                                                                                                                                                                                                                                                                                                                                                                                                                                                                                                                                                                                                                                                                                              |
|             | TS | 434.1i, 34.0, 56.4, 61.7, 74.7, 81.7, 94.5, 100.8, 113.2, 120.8, 126.2, 153.6, 161.0, 169.6, 171.5, 187.5, 218.6, 238.4, 242.8, 246.4, 254.3, 265.6, 279.0, 285.4, 290.4, 323.4, 336.2, 343.0, 357.3, 362.8, 388.8, 393.1, 405.0, 414.1, 436.9, 451.4, 464.4, 507.1, 561.0, 562.9, 566.8, 579.7, 581.0, 590.4, 617.7, 621.9, 665.1, 679.0, 719.6, 753.4, 776.2, 781.9, 790.8, 877.8, 907.2, 915.7, 920.2, 952.2, 964.8, 972.9, 978.3, 991.7, 995.5, 1004.1, 1008.8, 1026.3, 1031.9, 1062.7, 1069.8, 1077.8, 1080.7, 1089.9, 1100.4, 1114.6, 1133.1, 1200.8, 1266.4, 1305.2, 1334.9, 1338.5, 1345.7, 1349.6, 1353.6, 1359.4, 1362.4, 1372.8, 1381.9, 1414.7, 1417.2, 1426.6, 1429.3, 1430.6, 1435.8, 1439.9, 1445.0, 1451.9, 1453.8, 1461.5, 1464.0, 1476.5, 1526.7, 1596.9, 1602.8, 1645.2, 2809.4, 2966.9, 2972.8, 2981.5, 2987.0, 2998.3, 2999.5, 3014.4, 3019.2, 3047.1, 3055.5, 3060.7, 3063.9, 3067.3, 3070.7, 3078.8, 3112.2, 3134.5, 3166.1, 3194.6, 3208.1, 3215.5, 3240.3, 3265.9, 3639.7  |
|             | FS | 54.0, 63.4, 68.9, 72.8, 77.9, 86.8, 87.6, 104.6, 106.2, 113.2, 127.8, 151.9, 154.0, 166.0, 178.5, 188.1, 196.5, 215.4, 227.0, 239.7, 247.1, 260.7, 267.3, 271.8, 298.3, 317.9, 333.6, 342.8, 359.3, 366.2, 373.4, 378.8, 385.5, 396.8, 402.1, 437.2, 456.4, 463.5, 521.7, 564.5, 564.6, 573.0, 586.3, 588.3, 593.9, 624.4, 644.1, 651.4, 680.6, 739.5, 776.8, 779.7, 829.7, 884.8, 927.8, 935.1, 942.2, 958.1, 963.5, 974.3, 995.4, 1002.8, 1006.1, 1016.0, 1033.6, 1041.1, 1045.1, 1068.9, 1081.0, 1091.9, 1099.8, 1107.4, 1200.3, 1220.3, 1248.2, 1272.8, 1330.0, 1338.2, 1343.9, 1344.8, 1348.7, 1360.9, 1362.4, 1366.8, 1378.3, 1404.9, 1413.6, 1416.6, 1418.6, 1428.2, 1430.9, 1433.3, 1439.3, 1444.5, 1447.4, 1451.4, 1455.1, 1457.8, 1465.9, 1482.7, 1488.6, 1527.3, 1588.9, 1610.0, 2977.4, 2989.8, 2991.2, 3001.3, 3001.7, 3005.9, 3006.4, 3010.2, 3043.4, 3044.1, 3057.1, 3074.4, 3076.4, 3078.0, 3078.8, 3079.2, 3089.7, 3092.0, 3100.6, 3110.0, 3151.5, 3178.6, 3218.1, 3532.2, 3731.3  |
| 3-4 (ortho) | TS | 396.1i, 51.5, 55.5, 66.4, 77.1, 92.6, 99.6, 103.8, 114.2, 127.2, 138.4, 156.2, 162.6, 169.7, 182.2, 204.3, 209.6, 220.4, 224.8, 232.8, 236.4, 261.8, 286.6, 291.8, 302.4, 309.9, 337.6, 340.3, 347.2, 355.7, 376.9, 393.2, 401.0, 405.5, 416.4, 444.9, 458.9, 470.6, 514.0, 557.8, 561.3, 581.4, 583.0, 609.2, 622.3, 628.0, 671.6, 677.7, 718.3, 736.0, 770.6, 771.2, 797.7, 892.1, 906.4, 920.3, 939.4, 953.4, 962.7, 973.3, 987.7, 998.0, 1003.4, 1007.1, 1012.2, 1021.5, 1023.4, 1026.6, 1060.7, 1073.3, 1085.7, 1086.9, 1098.9, 1114.6, 1147.2, 1229.4, 1263.5, 1305.7, 1313.4, 1336.5, 1344.9, 1353.8, 1355.2, 1358.4, 1364.9, 1366.3, 1377.1, 1392.9, 1415.2, 1417.4, 1426.4, 1429.0, 1432.9, 1435.8, 1440.1, 1448.1, 1455.3, 1461.4, 1466.4, 1469.2, 1555.8, 1563.8, 1599.6, 1641.6, 2922.0, 2955.5, 2974.9, 2982.1, 2989.0, 2991.2, 2991.9, 3022.0, 3034.9, 3046.5, 3055.8, 3057.7, 3058.7, 3069.7, 3070.2, 3098.0, 3107.2, 3127.3, 3147.9, 3153.6, 3161.1, 3191.7, 3238.9, 3289.3, 3663.4 |
| 3-4 (meta)  | TS | 429.8i, 43.5, 52.2, 57.1, 63.8, 84.1, 87.4, 91.7, 97.2, 103.6, 113.1, 126.8, 136.1, 153.9, 179.3, 187.1, 209.7, 219.5, 235.7, 242.8, 245.7, 254.8, 268.3, 277.5, 294.6, 296.9, 322.2, 325.1, 330.9, 342.5, 346.9, 379.3, 385.8, 391.7, 434.9, 451.5, 457.8, 517.5, 544.1, 545.5, 553.5, 576.7, 591.7, 595.4, 614.1, 633.0, 661.3, 678.7, 680.8, 681.8, 735.9, 770.8, 808.8, 857.3, 907.0, 923.0, 930.9, 946.3, 957.6, 968.7, 969.7, 977.9, 987.8, 994.6, 995.6, 1018.7, 1052.7, 1059.9, 1064.8, 1077.7, 1085.1, 1094.4, 1134.2, 1175.3, 1197.0, 1222.0, 1249.2, 1308.8, 1331.3, 1332.3, 1341.9, 1350.6, 1352.2, 1358.2, 1364.4, 1368.1, 1380.3, 1387.4, 1402.6, 1412.9, 1415.3, 1419.5, 1422.7, 1428.6, 1433.1, 1436.7, 1443.3, 1449.6, 1452.6, 1459.9, 1468.2, 1537.7, 1563.5, 1612.0, 2320.2, 2943.5, 2953.8, 2957.1, 2978.6, 2979.2, 2984.3, 2998.9, 2999.1, 3004.9, 3027.1, 3053.5, 3071.8, 3082.8, 3091.1, 3092.4, 3117.0, 3147.0, 3156.0, 3172.3, 3174.6, 3194.6, 3230.3, 3273.8, 3647.0      |
| 4-E1        | IS | 17.3, 53.8, 64.3, 76.2, 86.8, 90.0, 100.2, 122.4, 140.4, 182.0, 190.3, 200.7, 223.6, 225.1, 237.5, 239.5, 242.9, 255.3, 263.6, 267.2, 289.0, 302.4, 310.5, 347.4, 360.0, 363.1, 376.5, 385.4, 400.3, 427.5, 439.3, 466.5, 467.3, 539.5, 554.2, 560.6, 562.0, 579.3, 582.9, 615.5, 632.7, 655.1, 688.7, 737.1, 770.8, 776.4, 822.6, 835.7, 922.4, 930.9, 939.4, 951.0, 957.3, 964.3, 994.0, 996.6, 1004.8, 1019.9, 1021.3, 1035.8, 1063.0, 1072.5, 1090.9, 1092.0, 1097.0, 1107.5, 1216.7, 1218.6, 1247.3, 1269.2, 1318.2, 1325.9, 1338.5, 1345.8, 1349.2, 1357.4, 1358.5, 1370.2, 1375.2, 1391.3, 1399.8, 1410.3, 1419.1, 1420.7, 1423.2, 1424.8, 1433.1, 1433.6, 1438.0, 1448.3, 1454.5, 1455.5, 1462.9, 1480.4, 1481.4, 1515.8, 1588.6, 2954.7, 2966.8, 2978.9, 2991.1, 2991.9, 2996.7, 3003.9, 3013.9, 3020.3, 3025.0, 3045.5, 3050.5, 3052.0, 3066.6, 3073.7, 3075.1, 3089.3, 3101.0, 3103.1, 3211.8, 3215.3, 3231.3, 3234.0                                                                    |
|             | TS | 455.7i, 46.2, 56.7, 64.6, 77.2, 92.2, 101.5, 103.5, 126.7, 152.9, 172.2, 177.8, 194.5, 211.6, 218.6, 232.2, 242.0, 252.3, 253.2, 258.0, 258.5, 300.7, 315.1, 316.7, 350.5, 363.3, 368.6, 384.4, 394.1, 428.7, 442.1, 455.0, 459.3, 473.3, 510.0, 539.7, 560.4, 563.8, 581.0, 593.3, 598.3, 635.3, 658.0, 688.9, 724.7, 765.8, 794.8, 818.1, 884.7, 914.4, 934.4, 960.5, 971.0, 981.3, 992.4, 1005.2, 1010.0, 1023.2, 1029.8, 1032.0, 1060.5, 1070.1, 1078.5, 1089.7, 1095.0, 1107.6, 1231.0, 1237.9, 1246.2, 1288.8, 1294.7, 1343.8, 1352.1, 1356.5, 1357.8, 1359.3, 1364.7, 1368.0, 1376.3, 1385.5, 1389.9, 1412.0, 1416.1, 1417.1, 1422.0, 1426.3, 1435.0, 1437.1, 1442.4, 1446.2, 1449.9, 1452.6, 1462.8, 1464.6, 1480.6, 1547.0, 1582.2, 2976.0, 2981.4,                                                                                                                                                                                                                                        |

|       |    |                                                                                                                                                                                                                                                                                                                                                                                                                                                                                                                                                                                                                                                                                                                                                                                                                                                                                                                                    |
|-------|----|------------------------------------------------------------------------------------------------------------------------------------------------------------------------------------------------------------------------------------------------------------------------------------------------------------------------------------------------------------------------------------------------------------------------------------------------------------------------------------------------------------------------------------------------------------------------------------------------------------------------------------------------------------------------------------------------------------------------------------------------------------------------------------------------------------------------------------------------------------------------------------------------------------------------------------|
|       |    | 2984.2, 2984.6, 2990.4, 2995.7, 2998.0, 3016.3, 3024.6, 3034.7, 3038.0, 3042.8, 3059.6, 3061.3, 3064.1, 3091.5, 3097.4, 3109.4, 3155.8, 3195.2, 3202.7, 3232.0, 3236.2                                                                                                                                                                                                                                                                                                                                                                                                                                                                                                                                                                                                                                                                                                                                                             |
| FS    |    | 30.3, 54.4, 61.9, 77.8, 84.1, 95.2, 95.9, 106.4, 134.6, 141.4, 152.6, 165.3, 177.0, 186.4, 203.5, 216.7, 236.1, 239.9, 252.4, 260.7, 276.6, 306.0, 309.3, 334.4, 351.6, 361.9, 364.2, 378.8, 410.3, 430.2, 447.3, 453.3, 476.7, 545.2, 549.7, 558.8, 565.0, 575.7, 599.6, 634.4, 636.5, 657.0, 694.8, 707.5, 754.7, 787.7, 807.8, 898.4, 910.1, 937.6, 954.1, 960.9, 962.3, 971.1, 985.5, 996.2, 1012.0, 1020.5, 1036.7, 1041.9, 1062.2, 1078.3, 1088.8, 1091.2, 1096.7, 1117.1, 1190.0, 1236.4, 1256.4, 1297.6, 1321.1, 1326.9, 1336.1, 1337.3, 1340.5, 1350.2, 1364.1, 1371.9, 1374.8, 1398.3, 1399.5, 1409.7, 1416.2, 1422.3, 1430.6, 1432.8, 1435.1, 1442.5, 1444.0, 1448.2, 1450.8, 1454.8, 1466.7, 1473.7, 1487.0, 1524.7, 1601.7, 2964.5, 2976.3, 2978.2, 2981.3, 2992.0, 2999.3, 3010.0, 3018.1, 3024.2, 3029.0, 3030.1, 3032.6, 3044.5, 3050.5, 3074.4, 3088.4, 3088.7, 3106.2, 3146.3, 3148.7, 3161.5, 3243.8, 3249.6    |
| E1-E2 | IS | 43.9, 59.8, 68.3, 77.2, 89.7, 95.6, 98.4, 108.2, 137.9, 139.1, 151.4, 163.9, 177.7, 192.2, 206.9, 219.1, 235.7, 235.9, 253.2, 259.5, 277.2, 306.7, 308.8, 335.4, 351.7, 361.5, 369.9, 381.4, 410.9, 429.1, 447.0, 453.1, 476.6, 544.0, 544.7, 561.9, 564.3, 575.1, 599.1, 632.9, 634.6, 658.5, 697.6, 706.9, 754.5, 787.9, 807.3, 897.4, 910.4, 939.3, 954.5, 961.2, 962.7, 972.0, 985.6, 997.0, 1012.4, 1020.5, 1036.9, 1042.4, 1063.0, 1078.8, 1088.9, 1093.4, 1096.8, 1117.6, 1190.1, 1237.5, 1256.8, 1298.1, 1320.7, 1326.5, 1335.3, 1337.2, 1340.7, 1350.6, 1364.6, 1373.3, 1374.9, 1398.6, 1399.8, 1409.0, 1416.0, 1423.0, 1431.2, 1432.8, 1434.6, 1442.3, 1443.0, 1447.6, 1451.7, 1455.3, 1467.1, 1473.5, 1487.3, 1524.3, 1601.7, 2961.8, 2976.3, 2977.0, 2981.7, 2991.3, 2998.4, 3010.8, 3019.1, 3022.3, 3028.9, 3029.1, 3031.8, 3043.9, 3051.1, 3073.6, 3088.1, 3089.4, 3107.4, 3146.4, 3149.7, 3161.5, 3244.3, 3253.3    |
|       | TS | 431.8i, 56.6, 68.3, 76.0, 84.6, 85.6, 96.4, 99.1, 111.3, 136.2, 145.3, 166.0, 171.6, 206.5, 222.9, 235.5, 244.5, 256.2, 264.4, 265.8, 286.6, 305.6, 307.2, 345.8, 356.7, 358.9, 365.5, 375.7, 403.1, 430.7, 438.7, 453.6, 466.8, 472.6, 512.8, 537.2, 559.6, 560.5, 563.0, 598.7, 635.4, 636.4, 657.7, 697.5, 716.1, 760.2, 788.0, 815.3, 897.1, 914.3, 933.7, 958.3, 972.2, 980.3, 999.3, 1006.4, 1010.4, 1020.1, 1025.7, 1037.8, 1057.6, 1075.3, 1082.0, 1090.2, 1091.1, 1107.3, 1232.2, 1246.8, 1249.1, 1288.9, 1304.0, 1336.7, 1348.2, 1352.6, 1356.9, 1361.5, 1365.0, 1367.2, 1371.3, 1391.7, 1394.8, 1409.7, 1416.2, 1422.1, 1423.9, 1427.6, 1431.4, 1437.9, 1439.5, 1447.6, 1450.7, 1452.6, 1456.8, 1466.7, 1480.3, 1532.1, 1586.9, 2956.7, 2984.0, 2987.5, 2995.6, 3000.4, 3003.2, 3004.8, 3008.7, 3034.1, 3035.8, 3045.2, 3045.8, 3056.5, 3057.5, 3063.8, 3095.3, 3099.9, 3102.4, 3164.1, 3181.8, 3207.9, 3235.0, 3255.0  |
|       | FS | 55.4, 62.1, 68.5, 76.9, 90.7, 103.7, 117.0, 124.8, 139.7, 153.0, 166.8, 173.7, 184.6, 212.2, 225.6, 236.4, 247.0, 254.3, 260.7, 271.5, 290.4, 298.9, 310.8, 348.4, 357.2, 361.2, 366.6, 389.1, 406.3, 425.3, 438.2, 460.5, 472.7, 544.3, 547.7, 561.0, 567.8, 573.1, 603.7, 638.9, 643.0, 661.2, 700.0, 736.6, 766.1, 790.1, 814.4, 844.2, 925.2, 949.5, 956.0, 961.3, 972.6, 983.5, 991.8, 1002.8, 1011.5, 1020.5, 1026.5, 1050.2, 1062.2, 1084.8, 1085.4, 1090.2, 1091.7, 1119.9, 1216.4, 1242.6, 1251.6, 1275.6, 1324.4, 1332.5, 1335.8, 1338.5, 1351.0, 1361.0, 1366.0, 1368.7, 1377.0, 1390.2, 1403.6, 1407.5, 1412.6, 1420.9, 1425.9, 1435.4, 1438.4, 1438.7, 1441.3, 1455.0, 1458.2, 1461.1, 1465.5, 1482.3, 1491.9, 1522.5, 1602.0, 2968.2, 2970.8, 2973.6, 2997.0, 2998.0, 3006.7, 3009.8, 3016.0, 3018.9, 3024.7, 3042.8, 3051.7, 3061.6, 3073.2, 3096.5, 3098.5, 3102.1, 3103.1, 3125.3, 3162.3, 3183.9, 3223.9, 3257.8 |
| E2-E3 | IS | 47.5, 55.6, 68.3, 75.0, 91.1, 103.4, 121.4, 124.2, 141.9, 157.1, 169.5, 177.2, 184.1, 214.7, 225.4, 236.2, 248.0, 255.4, 263.7, 271.6, 289.0, 298.1, 311.4, 346.9, 357.7, 360.5, 368.0, 390.6, 406.2, 422.6, 439.4, 458.4, 472.1, 543.8, 547.1, 565.2, 567.3, 572.5, 602.0, 638.7, 642.0, 658.7, 700.5, 734.0, 765.8, 790.4, 813.6, 842.5, 925.6, 950.7, 956.3, 962.8, 972.9, 984.6, 992.0, 1003.0, 1011.9, 1020.0, 1026.1, 1049.9, 1062.4, 1085.4, 1086.0, 1089.9, 1092.2, 1119.8, 1215.8, 1242.4, 1251.0, 1275.2, 1323.9, 1332.4, 1337.3, 1339.1, 1351.6, 1361.3, 1366.3, 1368.4, 1376.7, 1389.9, 1403.6, 1407.2, 1412.9, 1421.7, 1426.1, 1436.0, 1438.4, 1439.6, 1441.6, 1455.4, 1457.5, 1460.7, 1465.7, 1482.0, 1491.2, 1523.3, 1602.4, 2969.8, 2971.3, 2974.5, 2995.7, 2998.6, 3006.6, 3010.7, 3017.3, 3020.4, 3025.6, 3042.5, 3050.9, 3060.6, 3074.4, 3096.9, 3097.0, 3102.6, 3104.0, 3126.9, 3161.8, 3179.2, 3228.8, 3258.9 |
|       | TS | 405.2i, 49.3, 58.0, 68.9, 76.0, 80.9, 99.3, 107.2, 119.1, 141.4, 161.1, 167.4, 176.0, 180.3, 198.4, 220.4, 236.6, 247.8, 259.1, 262.9, 271.7, 304.9, 307.5, 340.6, 346.8, 362.8, 365.3, 385.1, 406.3, 423.0, 439.4, 456.4, 476.3, 488.9, 512.9, 537.0, 560.7, 566.9, 575.5, 593.3, 628.5, 638.0, 656.0, 679.8, 694.8, 768.9, 793.3, 826.1, 923.7, 928.2, 949.8, 970.6, 975.8, 978.9, 992.7, 1000.8, 1017.5, 1026.5, 1038.8, 1044.8, 1064.4, 1078.9, 1084.9, 1088.3, 1094.0, 1110.4, 1233.0, 1246.7, 1257.0, 1294.4, 1302.2, 1343.3, 1353.2, 1357.0, 1358.5, 1363.7, 1368.8, 1373.6, 1379.1, 1389.4, 1399.6, 1410.1, 1413.2, 1414.4, 1421.8, 1428.4, 1432.6, 1440.3, 1444.8, 1447.3, 1449.2, 1454.4, 1457.4, 1464.8, 1489.2, 1553.6, 1596.3, 2968.0, 2979.6, 2981.2, 2981.8, 2984.1, 3010.4, 3020.4, 3029.4, 3030.8, 3031.8, 3032.3, 3039.4, 3041.0, 3061.6, 3102.5, 3103.2, 3107.2, 3108.6, 3149.9, 3163.8, 3183.9, 3212.4, 3251.0 |
|       | FS | 30.7i, 59.1, 62.4, 70.1, 77.7, 84.7, 96.5, 105.1, 116.4, 123.3, 140.5, 146.8, 168.9, 190.9, 206.5, 212.5, 227.8, 238.0, 258.4, 263.6, 294.5, 311.0, 319.8, 350.0, 360.1, 360.7, 371.0, 382.3, 405.8, 410.5, 426.4, 448.6, 458.7, 541.1, 552.2, 554.7, 561.3, 568.2, 596.0, 602.2, 639.6, 659.0, 680.0, 682.0, 747.9, 768.7, 817.4, 845.0, 940.6, 946.0, 960.4, 971.6, 973.6, 977.3, 989.7, 1003.1,                                                                                                                                                                                                                                                                                                                                                                                                                                                                                                                                 |



|       |    |                                                                                                                                                                                                                                                                                                                                                                                                                                                                                                                                                                                                                                                                                                                                                                                                                                                                                                                                     |
|-------|----|-------------------------------------------------------------------------------------------------------------------------------------------------------------------------------------------------------------------------------------------------------------------------------------------------------------------------------------------------------------------------------------------------------------------------------------------------------------------------------------------------------------------------------------------------------------------------------------------------------------------------------------------------------------------------------------------------------------------------------------------------------------------------------------------------------------------------------------------------------------------------------------------------------------------------------------|
|       |    | 1017.0, 1019.2, 1028.7, 1038.1, 1065.3, 1073.8, 1084.4, 1092.3, 1103.0, 1106.4, 1169.7, 1232.3, 1257.9, 1293.0, 1327.7, 1334.4, 1343.0, 1347.3, 1349.7, 1361.3, 1363.1, 1371.5, 1374.6, 1395.9, 1398.5, 1408.0, 1413.9, 1415.5, 1422.2, 1437.8, 1440.2, 1440.8, 1443.4, 1447.4, 1453.2, 1456.9, 1460.5, 1466.7, 1479.3, 1529.0, 1587.1, 2958.7, 2984.2, 2985.5, 2989.2, 2994.1, 2999.0, 3007.4, 3010.1, 3015.5, 3034.8, 3035.6, 3037.0, 3061.6, 3070.4, 3076.4, 3088.4, 3092.7, 3093.2, 3104.4, 3118.1, 3120.3, 3199.1, 3215.2                                                                                                                                                                                                                                                                                                                                                                                                      |
| E3-1' | IS | 47.7, 50.0, 53.6, 68.2, 85.7, 91.0, 105.7, 121.3, 134.1, 153.1, 164.3, 176.5, 189.3, 201.8, 203.0, 214.2, 229.7, 230.9, 250.0, 255.1, 294.3, 298.8, 321.2, 332.9, 354.4, 360.7, 367.9, 375.0, 391.7, 408.2, 423.9, 438.5, 460.8, 538.3, 547.1, 554.6, 560.4, 573.1, 591.6, 595.0, 642.5, 661.5, 674.1, 678.5, 746.5, 766.7, 815.8, 830.0, 944.9, 949.7, 952.8, 975.2, 978.6, 984.8, 992.6, 1006.8, 1013.4, 1022.2, 1040.0, 1041.0, 1070.4, 1078.1, 1082.2, 1088.3, 1103.1, 1104.8, 1179.4, 1232.9, 1258.8, 1297.2, 1335.0, 1336.1, 1346.8, 1351.6, 1358.1, 1358.7, 1361.5, 1369.9, 1373.3, 1385.9, 1397.2, 1402.7, 1416.6, 1421.4, 1425.7, 1431.6, 1437.9, 1442.8, 1446.5, 1448.2, 1452.2, 1459.7, 1462.3, 1465.7, 1481.8, 1527.9, 1589.7, 2945.4, 2979.6, 2987.0, 2987.3, 2991.4, 2993.9, 2997.3, 3004.8, 3029.8, 3031.7, 3034.0, 3041.8, 3061.8, 3062.7, 3068.0, 3075.9, 3081.5, 3087.9, 3096.3, 3123.1, 3149.1, 3176.9, 3182.0   |
|       | TS | 1055.1i, 23.6, 56.7, 68.7, 69.5, 79.9, 93.1, 98.1, 107.0, 118.5, 127.4, 146.6, 168.1, 170.8, 187.0, 201.5, 205.6, 210.1, 216.7, 232.9, 244.4, 288.0, 299.6, 328.5, 330.2, 347.1, 358.4, 367.6, 378.3, 419.1, 438.3, 449.6, 465.8, 483.7, 495.3, 556.9, 569.2, 571.5, 573.6, 579.6, 580.7, 603.1, 651.4, 674.6, 699.9, 714.0, 779.9, 808.2, 814.7, 865.1, 925.8, 949.0, 956.3, 968.6, 973.1, 982.9, 990.3, 1005.6, 1019.9, 1025.7, 1034.8, 1037.5, 1052.0, 1073.7, 1075.6, 1080.9, 1100.8, 1179.1, 1184.5, 1255.4, 1278.3, 1297.0, 1318.5, 1344.6, 1352.6, 1354.9, 1359.4, 1364.0, 1369.1, 1378.6, 1397.9, 1402.9, 1411.8, 1417.7, 1418.9, 1422.0, 1430.4, 1432.9, 1445.0, 1448.7, 1455.9, 1459.4, 1462.5, 1465.6, 1477.4, 1538.3, 1571.5, 1579.6, 2947.0, 2954.5, 2976.0, 2979.4, 2990.2, 2990.5, 3002.0, 3024.5, 3028.3, 3037.5, 3041.8, 3045.1, 3050.0, 3069.9, 3080.1, 3097.9, 3120.4, 3134.9, 3164.4, 3180.1, 3188.9, 3196.9    |
|       | FS | 35.4, 62.8, 63.8, 68.6, 77.0, 89.3, 99.1, 106.7, 113.3, 129.7, 140.9, 155.3, 159.6, 170.6, 174.6, 181.1, 189.4, 194.0, 196.3, 215.5, 230.9, 256.6, 273.5, 305.3, 330.3, 345.8, 352.8, 354.7, 374.1, 376.4, 413.5, 435.4, 456.5, 465.8, 554.0, 565.5, 572.5, 574.4, 575.3, 590.6, 604.3, 605.7, 668.4, 699.6, 719.0, 722.5, 808.0, 811.6, 816.3, 827.1, 952.5, 970.1, 978.6, 983.2, 989.4, 994.3, 1001.7, 1005.0, 1019.5, 1032.5, 1035.1, 1051.2, 1054.4, 1073.8, 1074.0, 1081.2, 1102.2, 1202.4, 1224.8, 1253.2, 1328.1, 1337.1, 1338.2, 1351.2, 1352.0, 1357.5, 1358.4, 1361.8, 1368.7, 1405.8, 1407.2, 1414.8, 1416.7, 1417.6, 1428.4, 1431.4, 1436.2, 1445.4, 1454.6, 1456.8, 1463.5, 1468.3, 1468.5, 1471.3, 1580.3, 1598.3, 1611.4, 2832.9, 2938.6, 2945.6, 2970.8, 2975.5, 2983.0, 2983.2, 3019.7, 3022.3, 3025.0, 3026.3, 3038.7, 3039.2, 3052.5, 3061.4, 3061.8, 3086.2, 3136.9, 3138.6, 3162.5, 3178.7, 3179.5, 3192.8     |
| 4-P1  | IS | 41.8, 52.2, 56.5, 79.3, 91.0, 94.4, 107.3, 132.9, 152.6, 171.6, 198.2, 199.7, 217.3, 234.3, 241.9, 252.2, 262.0, 264.7, 280.8, 285.2, 291.9, 297.6, 319.2, 338.7, 355.5, 361.3, 376.6, 382.7, 397.7, 426.3, 437.6, 455.5, 474.9, 541.2, 561.0, 563.1, 566.1, 571.6, 589.5, 630.7, 637.5, 658.1, 683.6, 738.2, 769.3, 781.4, 826.2, 843.5, 925.8, 934.5, 945.4, 962.0, 966.5, 971.0, 995.6, 1002.9, 1008.4, 1020.0, 1034.2, 1037.4, 1068.7, 1077.7, 1089.4, 1093.4, 1098.2, 1105.7, 1216.0, 1219.5, 1251.1, 1274.5, 1318.0, 1330.9, 1341.8, 1349.2, 1351.8, 1359.0, 1368.6, 1369.3, 1375.9, 1397.6, 1403.6, 1411.2, 1419.7, 1422.7, 1425.0, 1430.5, 1431.8, 1436.1, 1445.8, 1447.4, 1456.7, 1460.4, 1468.6, 1477.8, 1485.9, 1518.5, 1592.6, 2965.2, 2969.9, 2981.6, 2989.5, 2995.9, 3000.2, 3004.6, 3006.9, 3010.1, 3033.2, 3044.4, 3055.0, 3064.6, 3069.5, 3074.5, 3081.8, 3084.3, 3103.2, 3103.8, 3184.0, 3197.2, 3202.1, 3212.1   |
|       | TS | 872.2i, 68.1, 82.1, 84.4, 87.8, 102.5, 109.0, 114.6, 148.2, 154.2, 172.3, 195.4, 216.8, 234.1, 257.6, 269.7, 284.0, 287.7, 289.6, 294.8, 323.2, 325.1, 327.8, 332.8, 348.6, 358.4, 364.9, 377.1, 403.8, 422.0, 437.8, 452.6, 481.5, 519.2, 555.9, 564.5, 574.2, 588.1, 604.2, 611.9, 623.9, 666.2, 673.0, 706.2, 739.8, 777.8, 803.4, 837.6, 899.5, 909.2, 930.6, 934.9, 949.6, 973.9, 978.5, 989.0, 1004.5, 1015.7, 1020.6, 1026.8, 1046.6, 1066.4, 1074.2, 1077.7, 1094.9, 1107.3, 1122.9, 1148.4, 1212.5, 1245.6, 1266.3, 1304.2, 1339.4, 1340.3, 1346.1, 1353.8, 1358.2, 1360.7, 1368.3, 1372.3, 1404.4, 1411.8, 1416.6, 1421.8, 1425.6, 1431.0, 1432.8, 1439.2, 1442.4, 1443.5, 1450.5, 1454.7, 1467.2, 1472.5, 1476.5, 1505.3, 1566.4, 1637.9, 2971.1, 2973.2, 2973.5, 2973.8, 2982.1, 2984.8, 3009.4, 3016.4, 3024.1, 3037.4, 3049.4, 3054.0, 3077.0, 3079.0, 3080.3, 3082.2, 3099.2, 3130.1, 3159.4, 3171.0, 3181.8, 3191.2 |
|       | FS | 48.4, 65.7, 76.7, 82.2, 87.6, 93.6, 103.0, 137.5, 153.1, 162.1, 185.2, 199.5, 225.1, 232.2, 248.6, 254.6, 263.1, 265.4, 277.3, 288.1, 290.9, 311.8, 321.3, 323.4, 332.4, 338.5, 357.4, 361.1, 367.6, 372.4, 415.7, 432.2, 448.3, 471.9, 512.7, 538.0, 550.8, 576.4, 598.0, 608.7, 622.6, 631.5, 695.6, 703.5, 720.0, 773.7, 783.2, 787.3, 797.7, 906.2, 922.7, 928.7, 949.4, 978.5, 980.4, 996.5, 1002.9, 1013.4, 1019.3, 1025.7, 1039.1, 1043.1, 1068.8, 1084.9, 1099.2, 1106.9, 1119.0, 1160.2, 1212.0, 1240.5, 1267.4, 1304.9, 1336.4, 1344.0, 1348.1, 1354.1, 1357.7, 1361.9, 1368.8, 1397.3, 1414.4, 1420.3, 1425.3, 1428.3, 1430.9, 1433.8, 1439.9, 1443.6, 1448.2, 1450.8, 1456.5, 1460.4, 1466.7, 1472.1, 1620.4, 1627.7, 1674.3, 2957.5, 2959.5, 2966.3, 2969.1, 2975.2, 2975.9, 2978.9, 3005.2, 3019.2, 3021.1, 3025.2, 3046.5, 3056.5, 3064.4, 3066.9, 3077.0, 3095.3, 3102.2, 3153.3, 3176.2, 3177.9, 3194.2, 3681.1    |

|       |    |                                                                                                                                                                                                                                                                                                                                                                                                                                                                                                                                                                                                                                                                                                                                                                                                                                                                                                                                                                                                                                                                           |
|-------|----|---------------------------------------------------------------------------------------------------------------------------------------------------------------------------------------------------------------------------------------------------------------------------------------------------------------------------------------------------------------------------------------------------------------------------------------------------------------------------------------------------------------------------------------------------------------------------------------------------------------------------------------------------------------------------------------------------------------------------------------------------------------------------------------------------------------------------------------------------------------------------------------------------------------------------------------------------------------------------------------------------------------------------------------------------------------------------|
| P1-P2 | IS | 56.0, 67.0, 69.9, 77.2, 85.4, 95.8, 98.6, 103.8, 112.9, 126.8, 134.4, 154.9, 165.5, 172.9, 174.3, 178.1, 189.3, 209.1, 230.0, 245.2, 247.9, 250.8, 271.6, 276.7, 285.0, 291.9, 322.5, 338.5, 340.3, 352.0, 369.7, 377.0, 386.2, 405.4, 413.9, 420.7, 445.4, 445.9, 482.5, 556.0, 564.9, 571.0, 580.5, 596.7, 599.0, 637.0, 640.9, 698.2, 698.6, 711.2, 732.7, 772.5, 780.1, 807.7, 846.4, 907.1, 914.0, 932.8, 952.7, 963.7, 973.9, 991.3, 1000.3, 1005.7, 1014.0, 1018.3, 1031.6, 1034.6, 1067.7, 1078.9, 1083.4, 1093.5, 1104.6, 1107.5, 1124.9, 1143.4, 1167.6, 1206.8, 1232.9, 1260.6, 1283.9, 1323.5, 1335.2, 1347.7, 1350.8, 1356.3, 1359.9, 1363.6, 1366.1, 1370.0, 1413.6, 1416.7, 1420.1, 1427.0, 1427.8, 1429.4, 1432.1, 1438.1, 1440.4, 1446.4, 1449.9, 1453.8, 1455.9, 1459.2, 1461.9, 1466.2, 1470.4, 1476.8, 1593.4, 1617.7, 1642.0, 1661.7, 2935.4, 2966.7, 2974.7, 2977.5, 2985.7, 2990.3, 2998.5, 3013.6, 3014.1, 3020.7, 3034.1, 3049.3, 3050.5, 3058.5, 3060.1, 3073.9, 3074.7, 3085.0, 3105.7, 3121.4, 3125.1, 3138.9, 3161.4, 3225.9, 3265.3, 3384.9 |
|       | TS | 421.6i, 60.9, 67.2, 82.3, 84.6, 88.2, 90.6, 100.2, 113.4, 115.9, 131.7, 149.4, 163.7, 171.0, 184.1, 188.5, 196.2, 223.4, 228.0, 238.1, 245.4, 259.4, 269.4, 280.6, 285.6, 295.6, 325.5, 332.2, 337.5, 360.0, 367.7, 373.9, 385.5, 386.1, 401.1, 408.5, 417.1, 421.6, 445.4, 488.2, 494.4, 556.4, 563.8, 572.8, 580.5, 587.9, 603.2, 617.1, 643.0, 669.5, 680.0, 712.7, 780.6, 783.1, 812.0, 827.8, 911.1, 922.9, 938.4, 958.0, 970.0, 976.3, 986.5, 999.0, 1002.3, 1003.3, 1014.6, 1018.5, 1029.2, 1036.3, 1044.1, 1051.6, 1073.2, 1085.4, 1093.8, 1099.2, 1110.4, 1122.2, 1171.8, 1209.2, 1269.6, 1293.8, 1327.0, 1339.6, 1339.8, 1347.9, 1351.9, 1354.3, 1357.7, 1363.4, 1368.7, 1373.4, 1415.3, 1419.9, 1422.9, 1425.9, 1428.7, 1431.1, 1439.8, 1444.0, 1451.8, 1455.2, 1458.1, 1466.4, 1468.3, 1471.2, 1478.7, 1543.9, 1598.3, 1599.9, 1649.2, 2806.0, 2972.9, 2980.2, 2983.2, 2985.0, 2989.5, 2992.5, 3009.3, 3021.4, 3039.3, 3040.8, 3053.3, 3064.2, 3065.0, 3069.4, 3071.0, 3077.8, 3078.4, 3089.4, 3103.4, 3123.3, 3128.2, 3221.6, 3238.2, 3257.0, 3261.7, 3650.9 |
|       | FS | 45.1, 52.9, 56.0, 70.6, 75.9, 79.1, 83.8, 87.5, 100.5, 103.6, 107.0, 123.5, 142.3, 165.1, 178.1, 186.8, 195.6, 203.4, 214.6, 222.9, 237.8, 240.6, 249.4, 258.7, 273.9, 278.4, 281.4, 287.1, 300.6, 322.2, 327.3, 347.5, 348.5, 357.0, 363.4, 365.6, 377.6, 402.1, 428.4, 458.3, 481.7, 495.0, 544.9, 553.8, 564.9, 573.1, 592.6, 616.5, 636.6, 644.8, 660.8, 666.6, 748.3, 768.4, 815.2, 875.5, 903.7, 927.4, 934.4, 939.5, 953.1, 961.3, 965.9, 982.7, 1000.6, 1002.8, 1017.7, 1019.5, 1034.3, 1048.5, 1070.1, 1072.4, 1089.5, 1091.0, 1097.1, 1121.6, 1166.3, 1199.4, 1252.8, 1291.3, 1315.7, 1333.3, 1343.0, 1344.5, 1348.2, 1348.7, 1350.7, 1364.4, 1366.5, 1370.0, 1382.6, 1405.5, 1411.9, 1419.7, 1422.4, 1427.8, 1429.9, 1434.7, 1437.4, 1440.6, 1447.0, 1448.6, 1450.7, 1457.5, 1461.7, 1462.8, 1465.4, 1491.8, 1527.8, 1596.5, 1598.8, 2982.1, 2987.3, 2987.7, 2993.1, 2993.4, 3001.5, 3006.9, 3008.8, 3013.8, 3037.4, 3065.2, 3065.6, 3069.1, 3070.4, 3077.3, 3080.3, 3081.9, 3086.5, 3099.5, 3100.5, 3104.3, 3109.5, 3133.5, 3176.5, 3203.3, 3586.5, 3764.7    |
| P2-P3 | IS | 56.9, 69.5, 79.4, 79.5, 86.4, 93.4, 108.7, 110.3, 132.2, 139.9, 172.1, 186.5, 195.5, 201.7, 214.0, 225.7, 241.1, 243.0, 251.6, 257.7, 266.8, 277.4, 282.4, 288.1, 301.5, 326.7, 345.9, 348.5, 356.9, 358.1, 362.6, 380.1, 402.2, 427.7, 458.2, 494.3, 540.6, 552.6, 553.0, 573.7, 591.7, 615.6, 630.3, 643.3, 660.5, 667.7, 749.0, 766.7, 815.1, 872.3, 903.5, 924.2, 934.8, 938.7, 952.5, 957.0, 965.6, 981.8, 1000.6, 1002.4, 1017.1, 1019.5, 1034.3, 1048.7, 1072.1, 1086.2, 1090.7, 1096.2, 1114.2, 1120.1, 1164.6, 1199.5, 1251.8, 1290.0, 1314.6, 1332.7, 1342.3, 1342.7, 1346.8, 1348.0, 1349.9, 1364.1, 1365.6, 1369.3, 1381.0, 1405.4, 1411.7, 1419.5, 1422.3, 1428.2, 1433.2, 1435.5, 1437.5, 1440.4, 1446.8, 1449.2, 1451.0, 1458.3, 1461.6, 1462.8, 1465.5, 1490.7, 1527.1, 1595.9, 2981.7, 2988.9, 2990.0, 2991.8, 2995.1, 2996.4, 3005.5, 3008.8, 3015.0, 3034.3, 3064.3, 3068.1, 3069.7, 3070.7, 3071.5, 3080.5, 3081.6, 3089.0, 3098.0, 3102.1, 3103.0, 3104.3, 3131.1, 3177.3, 3198.6                                                                    |
|       | TS | 471.2i, 48.2, 59.3, 70.6, 71.7, 83.8, 95.2, 102.9, 116.8, 129.1, 155.9, 175.2, 182.5, 184.8, 192.9, 206.9, 219.1, 229.2, 233.3, 244.0, 257.2, 262.7, 268.5, 286.0, 294.1, 302.5, 317.7, 349.0, 357.4, 361.4, 381.1, 392.4, 422.2, 433.1, 435.4, 471.1, 481.4, 534.1, 538.0, 557.4, 558.9, 590.9, 610.2, 625.6, 633.4, 659.3, 669.9, 727.3, 778.8, 811.9, 875.6, 895.7, 909.2, 919.8, 949.1, 959.1, 973.4, 988.3, 997.2, 1003.1, 1018.0, 1023.0, 1031.4, 1040.8, 1069.9, 1078.1, 1093.7, 1113.5, 1116.1, 1123.0, 1169.3, 1236.3, 1250.9, 1299.1, 1303.8, 1334.1, 1344.1, 1352.1, 1357.2, 1361.0, 1364.8, 1367.6, 1370.9, 1375.9, 1382.1, 1385.0, 1394.3, 1410.8, 1416.6, 1418.8, 1429.0, 1433.7, 1434.7, 1436.1, 1444.3, 1448.4, 1451.5, 1453.4, 1457.9, 1459.8, 1465.0, 1471.3, 1559.7, 1591.7, 2963.3, 2982.2, 2984.1, 2988.7, 2990.8, 2993.1, 2995.0, 2996.4, 3017.7, 3041.9, 3062.6, 3064.4, 3067.8, 3069.9, 3071.2, 3074.9, 3084.5, 3092.1, 3098.3, 3123.2, 3134.3, 3149.9, 3155.7, 3166.0, 3215.7                                                                    |
|       | FS | 40.7, 53.8, 68.7, 71.8, 86.5, 89.7, 94.7, 104.3, 116.4, 134.8, 136.9, 148.0, 175.6, 185.3, 197.7, 206.3, 216.3, 236.8, 238.8, 246.8, 258.7, 273.9, 294.2, 302.5, 310.0, 312.0, 334.8, 349.4, 361.4, 362.1, 371.8, 391.4, 405.1, 433.3, 453.6, 503.1, 548.4, 551.7, 561.0, 567.7, 594.2, 611.5, 635.0, 645.6, 655.8, 680.2, 715.9, 758.3, 795.4, 863.7, 890.6, 904.8, 916.0, 935.9, 945.4, 957.1, 966.8, 972.4, 988.9, 994.2, 1005.5, 1019.5, 1032.4, 1045.5, 1076.9, 1078.7, 1087.9, 1093.6, 1097.5, 1119.0, 1160.5, 1205.9, 1256.1, 1287.7, 1318.4, 1321.7, 1334.1, 1337.9, 1341.7, 1345.9, 1350.5, 1356.6, 1369.4, 1374.2, 1375.3, 1403.7, 1405.8, 1413.4, 1420.6, 1423.6, 1427.4, 1433.0, 1435.8, 1438.9, 1444.2, 1450.0, 1451.8, 1455.3, 1456.6, 1461.2, 1466.1, 1488.4,                                                                                                                                                                                                                                                                                              |

|       |    |                                                                                                                                                                                                                                                                                                                                                                                                                                                                                                                                                                                                                                                                                                                                                                                                                                                                                                                                                                                                          |
|-------|----|----------------------------------------------------------------------------------------------------------------------------------------------------------------------------------------------------------------------------------------------------------------------------------------------------------------------------------------------------------------------------------------------------------------------------------------------------------------------------------------------------------------------------------------------------------------------------------------------------------------------------------------------------------------------------------------------------------------------------------------------------------------------------------------------------------------------------------------------------------------------------------------------------------------------------------------------------------------------------------------------------------|
|       |    | 1522.1, 1594.8, 2975.9, 2979.7, 2981.5, 2985.0, 2988.8, 2989.8, 2996.6, 3004.4, 3004.8, 3033.2, 3035.7, 3045.8, 3052.4, 3066.3, 3069.8, 3076.5, 3079.7, 3097.3, 3102.4, 3110.5, 3116.8, 3133.9, 3140.9, 3170.4, 3193.9                                                                                                                                                                                                                                                                                                                                                                                                                                                                                                                                                                                                                                                                                                                                                                                   |
| P3-P4 | IS | 53.9, 63.2, 70.0, 73.3, 77.6, 84.4, 103.0, 104.4, 129.4, 148.2, 164.1, 169.6, 183.7, 189.4, 197.3, 221.2, 229.5, 238.0, 246.8, 260.2, 260.9, 266.9, 297.0, 300.7, 312.0, 321.2, 345.4, 357.6, 362.2, 366.5, 373.4, 413.9, 423.8, 447.5, 449.4, 499.1, 542.9, 553.5, 559.7, 571.6, 597.0, 618.1, 632.7, 632.8, 659.6, 683.3, 706.5, 759.4, 805.2, 871.7, 910.8, 913.5, 924.9, 933.8, 952.4, 956.6, 966.7, 973.8, 988.6, 998.1, 1013.1, 1017.2, 1037.9, 1045.6, 1080.2, 1088.1, 1097.4, 1105.7, 1111.8, 1118.5, 1160.2, 1203.8, 1266.3, 1293.8, 1327.3, 1329.0, 1333.4, 1338.0, 1339.9, 1341.7, 1354.5, 1358.5, 1370.6, 1371.9, 1379.0, 1381.5, 1403.3, 1411.3, 1417.3, 1427.0, 1430.6, 1434.0, 1437.0, 1443.1, 1446.0, 1446.6, 1450.4, 1455.1, 1461.0, 1464.5, 1470.3, 1493.6, 1528.4, 1606.6, 2982.0, 2984.0, 2988.7, 2989.4, 2991.7, 2993.7, 2998.9, 3005.5, 3007.8, 3034.9, 3041.9, 3046.4, 3048.5, 3071.7, 3080.5, 3081.5, 3083.9, 3104.2, 3107.5, 3120.7, 3125.2, 3135.2, 3145.4, 3172.2, 3242.6     |
|       | TS | 436.9i, 62.0, 70.8, 71.8, 87.6, 97.6, 102.9, 112.8, 121.2, 149.2, 158.9, 173.0, 189.4, 193.0, 207.3, 212.3, 222.7, 255.7, 259.7, 260.4, 269.2, 279.2, 288.3, 301.4, 303.3, 317.3, 359.4, 362.6, 365.2, 373.4, 395.4, 406.3, 433.6, 442.8, 451.8, 461.0, 499.6, 509.6, 555.9, 558.4, 561.9, 598.3, 624.6, 630.8, 633.7, 659.4, 690.7, 710.9, 777.4, 821.6, 882.1, 899.7, 917.6, 920.9, 950.8, 964.1, 981.5, 987.3, 1000.8, 1015.5, 1027.4, 1030.3, 1040.8, 1057.9, 1077.3, 1081.5, 1088.9, 1107.4, 1111.9, 1121.2, 1169.7, 1245.4, 1256.5, 1286.1, 1307.2, 1333.2, 1348.8, 1351.0, 1353.8, 1358.9, 1363.6, 1370.1, 1371.8, 1373.4, 1380.2, 1398.3, 1405.1, 1412.6, 1419.2, 1423.4, 1426.9, 1429.4, 1434.1, 1439.3, 1442.1, 1446.5, 1449.0, 1456.4, 1461.9, 1462.7, 1471.7, 1477.9, 1550.2, 1608.5, 2964.2, 2980.6, 2987.6, 2997.5, 2998.3, 3003.1, 3012.7, 3017.1, 3026.2, 3039.8, 3045.4, 3049.0, 3058.4, 3070.8, 3078.8, 3082.1, 3084.0, 3095.2, 3108.3, 3112.4, 3144.5, 3157.4, 3171.1, 3172.4, 3257.0 |
|       | FS | 44.7, 60.5, 70.4, 76.6, 91.9, 100.4, 111.2, 116.5, 133.4, 170.1, 172.1, 174.7, 177.5, 196.6, 204.6, 224.4, 228.7, 256.9, 259.3, 262.1, 274.5, 288.3, 293.5, 305.5, 307.4, 323.8, 344.6, 360.5, 372.3, 381.6, 388.2, 409.8, 432.4, 436.6, 457.5, 491.7, 544.8, 557.1, 564.4, 566.0, 607.8, 622.0, 630.9, 645.3, 657.0, 694.5, 735.7, 779.2, 809.5, 849.8, 875.8, 920.0, 936.7, 948.7, 957.7, 961.6, 976.4, 986.8, 997.1, 1016.7, 1036.9, 1043.3, 1054.6, 1063.5, 1079.9, 1089.3, 1092.2, 1098.6, 1103.5, 1118.3, 1164.5, 1237.3, 1255.4, 1273.8, 1309.5, 1323.4, 1334.1, 1338.3, 1344.3, 1348.6, 1365.5, 1371.5, 1374.1, 1378.4, 1380.7, 1389.9, 1401.5, 1418.7, 1420.1, 1425.8, 1430.3, 1436.4, 1438.5, 1442.3, 1444.1, 1447.8, 1460.1, 1464.2, 1467.8, 1475.1, 1481.3, 1493.5, 1539.2, 1620.7, 2961.1, 2963.0, 2992.4, 2995.8, 2997.0, 3004.0, 3014.8, 3017.7, 3025.5, 3028.3, 3050.3, 3063.4, 3071.7, 3077.6, 3083.2, 3085.2, 3085.8, 3099.5, 3105.7, 3110.6, 3121.7, 3126.5, 3149.2, 3180.9, 3225.2   |
| P4-P5 | IS | 48.7, 61.6, 73.2, 81.3, 90.6, 102.4, 109.2, 120.4, 125.0, 144.7, 147.9, 181.6, 182.6, 200.2, 217.2, 223.8, 237.4, 250.0, 254.2, 261.2, 268.8, 282.8, 285.7, 295.6, 307.9, 318.8, 352.9, 359.2, 363.6, 370.5, 393.7, 401.2, 434.9, 441.3, 450.7, 491.3, 536.3, 549.9, 556.8, 573.2, 597.6, 635.1, 638.9, 646.3, 657.2, 678.6, 746.0, 777.4, 805.7, 891.9, 915.0, 936.8, 942.3, 943.7, 957.9, 975.9, 981.8, 992.7, 1010.7, 1013.6, 1017.2, 1028.9, 1032.7, 1047.2, 1076.6, 1087.4, 1097.4, 1110.4, 1121.2, 1126.2, 1173.5, 1199.8, 1249.6, 1298.7, 1318.2, 1330.1, 1340.6, 1344.3, 1348.1, 1356.2, 1359.7, 1365.0, 1369.3, 1373.4, 1383.1, 1397.5, 1409.0, 1415.6, 1422.7, 1428.8, 1432.2, 1435.6, 1438.3, 1443.4, 1446.0, 1450.5, 1452.1, 1461.1, 1469.6, 1472.7, 1482.6, 1486.5, 1541.6, 1615.3, 2952.0, 2964.7, 2977.4, 2999.1, 3006.3, 3011.2, 3014.5, 3016.1, 3036.7, 3036.8, 3052.0, 3057.3, 3071.0, 3086.6, 3087.5, 3089.0, 3096.6, 3097.7, 3105.2, 3112.8, 3118.1, 3152.3, 3200.2, 3211.4, 3232.8  |
|       | TS | 420.3i, 49.2, 53.0, 66.4, 78.4, 82.7, 90.1, 96.1, 103.8, 119.1, 133.6, 150.1, 162.3, 185.1, 197.9, 210.3, 221.9, 229.8, 244.3, 259.1, 259.7, 281.4, 291.4, 303.3, 321.9, 333.2, 341.1, 360.8, 363.5, 386.6, 400.6, 408.1, 434.3, 440.2, 452.4, 483.9, 492.2, 514.4, 540.1, 559.5, 561.4, 605.4, 620.1, 629.6, 637.2, 662.0, 675.2, 680.6, 785.8, 828.4, 882.6, 902.3, 915.0, 924.6, 959.1, 972.8, 979.9, 987.2, 994.8, 1016.1, 1019.1, 1034.2, 1042.6, 1061.1, 1074.3, 1089.5, 1094.0, 1105.4, 1114.5, 1136.0, 1178.1, 1243.9, 1257.9, 1271.0, 1305.5, 1334.5, 1347.5, 1353.6, 1358.5, 1360.7, 1361.7, 1372.5, 1376.1, 1381.3, 1384.8, 1390.3, 1398.0, 1411.1, 1413.5, 1417.2, 1423.4, 1429.5, 1431.0, 1437.2, 1440.7, 1448.5, 1449.1, 1456.0, 1459.5, 1468.4, 1476.6, 1484.3, 1562.9, 1605.8, 2982.6, 2985.6, 2990.5, 2991.0, 2991.4, 2997.9, 3009.5, 3011.4, 3040.2, 3040.3, 3042.4, 3055.1, 3059.4, 3063.3, 3073.3, 3081.7, 3086.9, 3098.3, 3108.1, 3134.0, 3138.9, 3152.3, 3182.0, 3193.5, 3211.3    |
|       | FS | 28.7, 45.0, 61.4, 64.1, 77.5, 88.1, 92.9, 100.7, 110.4, 120.1, 134.9, 143.5, 179.0, 200.5, 207.8, 220.5, 235.9, 241.0, 261.9, 264.0, 271.8, 282.9, 302.3, 311.7, 322.9, 349.3, 364.0, 365.0, 373.3, 382.6, 394.0, 418.3, 427.2, 447.2, 458.0, 472.8, 542.4, 547.9, 560.7, 564.3, 582.2, 598.5, 603.2, 639.5, 655.1, 660.4, 684.1, 731.5, 807.3, 818.6, 895.5, 916.7, 944.6, 948.9, 952.3, 960.3, 975.5, 979.8, 997.0, 1011.9, 1020.3, 1029.2, 1040.8, 1049.9, 1067.2, 1077.4, 1083.1, 1097.7, 1101.5, 1130.4, 1153.9, 1190.9, 1257.9, 1283.0, 1309.3, 1335.6, 1338.7, 1343.7, 1347.2, 1354.7, 1359.7, 1365.4, 1368.9, 1374.7, 1383.3, 1388.6, 1397.4, 1409.8, 1413.7, 1420.6, 1428.5, 1431.6, 1435.9, 1439.8, 1447.0, 1450.4, 1454.3, 1460.0, 1461.9, 1463.3, 1470.7, 1479.3,                                                                                                                                                                                                                            |

|       |    |                                                                                                                                                                                                                                                                                                                                                                                                                                                                                                                                                                                                                                                                                                                                                                                                                                                                                                                                                                                                        |
|-------|----|--------------------------------------------------------------------------------------------------------------------------------------------------------------------------------------------------------------------------------------------------------------------------------------------------------------------------------------------------------------------------------------------------------------------------------------------------------------------------------------------------------------------------------------------------------------------------------------------------------------------------------------------------------------------------------------------------------------------------------------------------------------------------------------------------------------------------------------------------------------------------------------------------------------------------------------------------------------------------------------------------------|
|       |    | 1529.5, 1588.1, 2952.8, 2983.7, 2986.5, 2988.6, 2991.2, 3000.9, 3007.6, 3012.4, 3027.4, 3034.6, 3037.2, 3048.4, 3055.7, 3073.2, 3089.3, 3089.9, 3097.4, 3102.4, 3104.2, 3109.6, 3118.2, 3135.4, 3137.4, 3175.3, 3179.2                                                                                                                                                                                                                                                                                                                                                                                                                                                                                                                                                                                                                                                                                                                                                                                 |
| P5-1' | IS | 49.9, 58.8, 70.2, 78.4, 94.4, 98.6, 105.6, 109.3, 126.6, 140.9, 165.7, 178.8, 186.6, 207.1, 214.8, 228.9, 240.2, 254.4, 258.5, 266.0, 286.5, 300.1, 321.7, 324.3, 343.7, 359.1, 363.9, 369.4, 373.8, 384.1, 420.4, 429.6, 436.6, 441.8, 451.9, 470.4, 538.1, 545.6, 549.5, 562.8, 563.9, 587.1, 594.5, 618.0, 638.7, 657.0, 676.4, 707.1, 794.6, 805.1, 903.4, 911.1, 939.0, 951.0, 954.2, 958.2, 970.8, 981.5, 992.2, 1018.6, 1019.8, 1023.2, 1040.3, 1054.8, 1068.8, 1074.1, 1081.3, 1096.2, 1101.7, 1129.0, 1151.7, 1206.9, 1251.8, 1286.7, 1299.6, 1322.9, 1339.2, 1340.5, 1347.0, 1358.2, 1358.5, 1363.1, 1365.4, 1369.9, 1377.0, 1388.1, 1397.6, 1405.9, 1412.3, 1419.4, 1425.2, 1427.5, 1431.0, 1435.6, 1443.6, 1449.1, 1454.5, 1454.9, 1462.9, 1467.9, 1471.6, 1481.8, 1521.2, 1588.6, 2950.0, 2962.1, 2967.7, 2973.1, 2982.5, 2988.6, 2988.9, 3004.8, 3006.3, 3015.1, 3030.3, 3035.9, 3049.7, 3054.9, 3067.3, 3081.2, 3083.6, 3085.4, 3097.0, 3097.8, 3105.0, 3134.6, 3204.0, 3219.0, 3239.1  |
|       | TS | 266.1i, 43.6, 62.7, 64.2, 74.8, 96.3, 103.7, 109.2, 113.8, 123.4, 129.9, 141.7, 146.7, 150.5, 180.5, 190.2, 199.1, 205.0, 215.9, 225.4, 231.6, 249.2, 271.9, 299.5, 314.3, 328.1, 343.6, 354.5, 358.5, 365.5, 376.7, 414.8, 436.7, 445.5, 452.7, 466.1, 544.4, 566.4, 568.8, 572.1, 573.1, 577.6, 582.8, 603.2, 628.8, 661.4, 697.0, 718.6, 808.0, 814.9, 819.2, 839.0, 897.8, 932.8, 951.8, 960.9, 969.0, 977.1, 983.1, 991.7, 1003.8, 1018.4, 1029.2, 1033.4, 1043.2, 1052.4, 1073.7, 1074.4, 1082.0, 1106.2, 1111.5, 1192.6, 1233.9, 1255.8, 1290.2, 1324.2, 1327.7, 1344.5, 1352.3, 1354.8, 1358.3, 1360.2, 1363.4, 1365.8, 1373.8, 1391.4, 1402.5, 1407.3, 1414.0, 1418.5, 1426.5, 1433.8, 1435.6, 1440.4, 1446.3, 1451.1, 1454.1, 1460.0, 1462.7, 1467.7, 1473.4, 1474.8, 1571.6, 1592.1, 1608.7, 2948.2, 2956.1, 2958.3, 2979.7, 2980.6, 2982.2, 2991.5, 3013.5, 3022.8, 3028.5, 3032.5, 3035.6, 3039.5, 3048.2, 3064.2, 3065.2, 3069.6, 3077.7, 3109.9, 3117.8, 3140.1, 3146.8, 3191.8, 3199.7 |
|       | FS | 50.6, 59.4, 62.3, 81.7, 90.7, 96.6, 106.7, 115.0, 117.3, 123.5, 138.9, 143.0, 160.2, 172.3, 185.5, 193.5, 196.1, 209.4, 219.9, 232.7, 238.1, 271.7, 277.0, 295.2, 314.3, 329.1, 352.1, 356.7, 363.7, 381.5, 385.9, 417.7, 441.3, 444.2, 453.2, 465.6, 539.2, 563.7, 570.7, 572.9, 576.0, 597.4, 602.3, 604.0, 658.5, 686.9, 714.4, 720.3, 761.5, 805.8, 816.6, 832.6, 928.6, 938.5, 952.2, 967.4, 977.4, 978.8, 983.7, 992.4, 1003.6, 1017.9, 1031.2, 1031.6, 1034.4, 1049.7, 1050.6, 1074.1, 1074.4, 1079.6, 1103.9, 1175.9, 1252.9, 1260.1, 1291.1, 1329.7, 1338.2, 1349.2, 1352.0, 1356.2, 1358.4, 1359.7, 1360.7, 1367.3, 1399.5, 1406.0, 1409.5, 1415.7, 1417.9, 1421.5, 1428.0, 1434.0, 1440.1, 1443.3, 1448.1, 1453.9, 1462.1, 1464.3, 1468.8, 1473.5, 1476.8, 1580.2, 1599.4, 1655.7, 2647.7, 2936.3, 2947.4, 2969.9, 2977.6, 2981.3, 2986.1, 2996.0, 3017.1, 3022.8, 3030.7, 3032.6, 3037.6, 3039.6, 3064.3, 3069.9, 3073.4, 3077.4, 3083.5, 3101.5, 3132.8, 3150.2, 3180.0, 3184.6, 3196.7   |

**PMB and TMBs mediated methylations**

|            |    |                                                                                                                                                                                                                                                                                                                                                                                                                                                                                                                                                                                                                                                                                                                                                                                                                                                         |
|------------|----|---------------------------------------------------------------------------------------------------------------------------------------------------------------------------------------------------------------------------------------------------------------------------------------------------------------------------------------------------------------------------------------------------------------------------------------------------------------------------------------------------------------------------------------------------------------------------------------------------------------------------------------------------------------------------------------------------------------------------------------------------------------------------------------------------------------------------------------------------------|
| prehnitene |    |                                                                                                                                                                                                                                                                                                                                                                                                                                                                                                                                                                                                                                                                                                                                                                                                                                                         |
| 1          |    | 19.5, 42.4, 45.3, 54.8, 58.6, 64.8, 76.9, 107.9, 136.3, 150.7, 182.6, 215.3, 242.2, 259.3, 288.4, 309.7, 312.5, 316.9, 331.7, 357.1, 362.8, 466.8, 484.2, 500.5, 512.3, 517.6, 546.0, 598.4, 626.7, 648.7, 704.5, 715.9, 725.5, 727.8, 781.6, 789.4, 850.9, 914.4, 921.0, 971.2, 982.8, 995.3, 1008.4, 1026.0, 1028.4, 1037.3, 1060.3, 1063.5, 1165.8, 1203.9, 1247.7, 1259.4, 1329.0, 1353.7, 1354.1, 1360.7, 1364.9, 1394.1, 1417.8, 1423.9, 1425.0, 1438.0, 1441.0, 1441.9, 1455.1, 1458.7, 1480.2, 1581.8, 1599.1, 2946.7, 2951.0, 2953.8, 2969.4, 2993.4, 3004.4, 3005.5, 3030.1, 3046.1, 3054.2, 3069.9, 3095.3, 3110.3, 3123.9, 3697.8                                                                                                                                                                                                           |
| 3-4        | TS | 432.0i, 17.6, 29.7, 43.5, 52.6, 60.3, 68.9, 83.6, 107.7, 120.6, 132.1, 142.5, 158.3, 197.4, 211.1, 235.2, 253.7, 258.0, 259.1, 275.2, 279.6, 284.3, 298.6, 324.3, 336.9, 347.0, 357.8, 376.9, 410.6, 473.9, 478.2, 491.2, 497.7, 502.2, 566.1, 572.6, 580.3, 615.6, 621.3, 663.9, 679.8, 692.3, 724.5, 748.9, 762.6, 812.1, 822.7, 876.2, 891.4, 921.9, 926.0, 955.2, 961.9, 972.4, 974.9, 986.0, 997.7, 1002.1, 1004.2, 1019.7, 1046.8, 1078.0, 1085.7, 1090.5, 1102.3, 1164.3, 1174.5, 1183.8, 1302.2, 1317.0, 1334.5, 1338.8, 1349.5, 1350.1, 1361.3, 1370.6, 1390.3, 1414.7, 1418.6, 1427.5, 1429.5, 1434.1, 1446.7, 1449.9, 1450.4, 1467.1, 1530.1, 1582.1, 1603.8, 1657.6, 2852.6, 2959.1, 2974.6, 2975.7, 2982.1, 3012.6, 3046.0, 3054.5, 3054.8, 3057.0, 3060.2, 3060.9, 3072.0, 3087.5, 3093.0, 3111.4, 3134.8, 3178.2, 3242.4, 3266.0, 3649.7 |
| isodurene  |    |                                                                                                                                                                                                                                                                                                                                                                                                                                                                                                                                                                                                                                                                                                                                                                                                                                                         |
| 1          |    | 38.1, 46.8, 49.3, 72.4, 84.8, 94.2, 108.9, 125.1, 143.9, 160.6, 180.3, 193.3, 226.1, 237.8, 267.4, 287.6, 292.6, 303.6, 315.7, 335.1, 358.2, 449.0, 494.9, 509.5, 512.6, 541.5, 544.7, 577.5, 594.9, 626.0, 698.7, 705.1, 719.5, 735.9, 779.2, 825.4, 860.1, 893.4, 960.0, 972.1, 987.5, 998.4, 1008.5, 1015.8, 1020.8, 1031.7, 1038.1, 1063.6, 1138.7, 1204.7, 1238.1, 1297.9, 1334.4, 1353.0, 1357.4, 1360.2, 1364.2, 1396.7, 1412.9, 1418.1, 1427.3, 1435.7, 1441.4, 1442.4, 1445.1, 1460.9, 1480.1, 1578.8, 1614.2, 2942.9, 2947.3, 2970.3, 2991.5, 2999.9, 3001.7, 3036.4, 3038.3, 3053.2, 3060.1, 3061.4, 3093.5, 3104.4, 3147.1, 3697.8                                                                                                                                                                                                          |
| 3-4        | TS | 437.2i, 38.0, 48.0, 60.1, 70.2, 79.0, 85.9, 100.4, 113.7, 128.1, 159.1, 163.2, 199.4, 201.7, 216.9, 232.3, 253.1, 257.4, 263.8, 270.7, 281.8, 295.5, 300.7, 316.9, 327.6, 345.6, 355.5, 379.4, 417.5, 460.3, 500.0, 509.5, 513.2, 553.2, 567.7, 576.1, 584.3, 589.6, 622.3, 666.4, 673.8, 684.5, 701.7,                                                                                                                                                                                                                                                                                                                                                                                                                                                                                                                                                 |

|        |    |                                                                                                                                                                                                                                                                                                                                                                                                                                                                                                                                                                                                                                                                                                                                                                                                                                                        |
|--------|----|--------------------------------------------------------------------------------------------------------------------------------------------------------------------------------------------------------------------------------------------------------------------------------------------------------------------------------------------------------------------------------------------------------------------------------------------------------------------------------------------------------------------------------------------------------------------------------------------------------------------------------------------------------------------------------------------------------------------------------------------------------------------------------------------------------------------------------------------------------|
|        |    | 754.1, 771.5, 826.4, 853.0, 865.6, 882.6, 914.3, 933.0, 952.0, 963.0, 978.1, 987.9, 996.1, 1000.8, 1010.5, 1015.4, 1028.3, 1036.0, 1055.1, 1094.0, 1099.1, 1106.4, 1161.9, 1178.7, 1223.5, 1300.2, 1333.9, 1338.7, 1341.2, 1350.3, 1358.2, 1364.2, 1368.7, 1394.7, 1401.2, 1419.1, 1425.8, 1427.9, 1432.3, 1440.6, 1448.4, 1461.4, 1462.6, 1536.9, 1594.8, 1609.3, 1660.9, 2806.9, 2976.8, 2983.8, 2985.7, 3000.6, 3033.2, 3054.6, 3055.1, 3064.5, 3065.0, 3072.6, 3073.1, 3077.2, 3099.1, 3110.2, 3115.2, 3150.5, 3156.8, 3241.7, 3265.7, 3641.3                                                                                                                                                                                                                                                                                                      |
| durene |    |                                                                                                                                                                                                                                                                                                                                                                                                                                                                                                                                                                                                                                                                                                                                                                                                                                                        |
| 1      |    | 21.7, 42.8, 44.9, 52.0, 60.9, 70.6, 121.1, 140.0, 144.1, 148.5, 165.7, 186.7, 240.6, 262.3, 272.9, 288.4, 290.4, 293.6, 308.7, 337.4, 356.8, 429.5, 443.5, 507.7, 516.2, 517.6, 581.4, 601.7, 630.8, 666.1, 704.8, 709.0, 728.2, 740.3, 780.8, 805.9, 859.2, 868.1, 967.0, 975.5, 988.8, 1001.9, 1010.6, 1017.4, 1030.2, 1034.5, 1035.2, 1070.6, 1186.5, 1193.1, 1265.3, 1276.2, 1332.2, 1351.4, 1353.6, 1364.3, 1365.9, 1380.3, 1421.2, 1421.9, 1428.2, 1435.4, 1437.4, 1438.7, 1445.0, 1456.0, 1496.7, 1561.0, 1619.4, 2947.6, 2950.4, 2951.6, 2952.1, 2995.9, 2999.7, 3002.9, 3005.2, 3043.7, 3045.4, 3047.2, 3049.5, 3108.7, 3113.3, 3697.9                                                                                                                                                                                                        |
| 1-2    | TS | 361.2i, 42.1, 65.9, 69.7, 72.9, 80.6, 87.5, 116.7, 131.5, 133.7, 136.5, 158.5, 171.2, 183.4, 189.2, 206.5, 220.2, 248.0, 266.5, 274.3, 284.8, 301.0, 307.7, 324.0, 335.5, 363.6, 394.0, 430.5, 435.4, 504.1, 511.0, 520.4, 559.2, 571.6, 576.6, 636.1, 659.7, 665.9, 687.6, 690.2, 705.4, 729.6, 805.6, 864.0, 869.0, 882.4, 928.3, 959.3, 972.0, 979.9, 995.4, 1002.7, 1011.5, 1013.4, 1015.6, 1028.5, 1033.9, 1075.7, 1100.1, 1192.5, 1195.3, 1261.4, 1275.5, 1333.8, 1343.2, 1353.6, 1356.2, 1363.6, 1364.6, 1369.6, 1374.8, 1417.2, 1418.1, 1422.8, 1429.2, 1436.7, 1441.4, 1447.8, 1452.6, 1487.6, 1523.6, 1611.0, 1611.9, 2958.3, 2959.0, 2964.8, 2966.4, 3008.3, 3013.0, 3020.8, 3032.4, 3042.0, 3060.8, 3061.0, 3064.8, 3070.1, 3108.2, 3126.2, 3177.8, 3232.5, 3250.4, 3583.6                                                                 |
| 2      |    | 29.4, 50.6, 55.1, 57.2, 65.1, 70.1, 84.8, 117.7, 143.7, 153.7, 173.3, 191.6, 219.4, 266.9, 267.1, 277.1, 282.4, 296.8, 313.5, 316.4, 332.9, 337.0, 365.1, 429.9, 444.9, 502.7, 524.1, 551.1, 557.2, 571.2, 639.0, 655.1, 657.6, 658.0, 685.7, 694.7, 782.9, 843.9, 873.7, 905.9, 939.1, 940.1, 973.4, 984.1, 988.0, 1001.1, 1012.6, 1017.3, 1025.1, 1035.2, 1074.3, 1092.2, 1151.8, 1184.1, 1224.0, 1279.4, 1320.1, 1333.1, 1336.1, 1344.3, 1357.7, 1368.0, 1374.7, 1399.3, 1406.2, 1420.3, 1424.6, 1426.4, 1429.4, 1431.9, 1436.6, 1452.3, 1462.8, 1479.3, 1513.0, 1616.4, 2944.3, 2948.2, 2974.4, 2974.6, 2982.0, 3001.4, 3021.1, 3034.3, 3064.6, 3066.4, 3071.0, 3072.4, 3074.1, 3075.3, 3075.3, 3087.8, 3130.8                                                                                                                                     |
| 3-4    | TS | 432.4i, 28.7, 42.9, 47.0, 54.5, 65.5, 72.1, 80.4, 84.5, 100.6, 119.2, 140.3, 168.1, 193.2, 205.2, 218.0, 242.7, 260.4, 265.6, 278.2, 281.6, 292.3, 303.1, 316.1, 333.6, 341.9, 351.0, 362.9, 413.8, 426.9, 454.2, 498.6, 502.4, 529.1, 566.8, 579.2, 583.2, 624.2, 659.2, 667.1, 679.5, 683.6, 697.1, 749.1, 775.8, 784.0, 869.4, 872.6, 899.3, 911.3, 921.2, 924.6, 958.3, 970.6, 994.7, 997.8, 999.5, 1010.5, 1023.1, 1023.9, 1027.2, 1041.4, 1082.1, 1092.6, 1099.9, 1156.8, 1176.4, 1251.5, 1281.3, 1323.4, 1329.7, 1339.7, 1353.6, 1357.7, 1362.5, 1367.0, 1393.4, 1404.2, 1412.0, 1423.0, 1426.9, 1429.3, 1436.4, 1439.8, 1452.3, 1458.8, 1534.0, 1603.1, 1610.2, 1660.3, 2859.5, 2957.8, 2967.1, 2974.2, 2975.8, 3010.8, 3021.4, 3051.8, 3053.6, 3062.7, 3063.8, 3064.6, 3064.8, 3066.7, 3072.0, 3094.6, 3104.6, 3165.8, 3253.8, 3277.2, 3642.8 |
| 4      | 4  | 32.7, 39.4, 47.6, 60.3, 62.6, 68.0, 74.6, 95.8, 118.7, 138.5, 175.3, 182.2, 201.6, 213.4, 260.2, 263.2, 276.1, 283.1, 295.4, 306.7, 313.1, 327.8, 348.1, 362.4, 370.2, 428.9, 452.1, 498.2, 527.6, 547.0, 559.4, 596.6, 628.8, 656.0, 656.8, 686.4, 690.4, 728.3, 770.1, 812.7, 884.9, 887.9, 902.4, 934.2, 940.0, 941.7, 977.2, 991.0, 993.7, 1002.5, 1012.5, 1025.4, 1031.4, 1053.0, 1085.2, 1093.5, 1147.9, 1174.6, 1203.1, 1220.1, 1255.6, 1276.4, 1323.2, 1336.0, 1343.2, 1356.5, 1362.6, 1371.5, 1378.2, 1407.1, 1423.3, 1426.9, 1428.8, 1429.3, 1433.6, 1437.3, 1442.6, 1448.1, 1460.1, 1465.5, 1472.3, 1519.4, 1618.0, 2950.7, 2984.1, 2984.2, 2985.3, 2985.9, 2997.2, 3016.9, 3039.9, 3042.7, 3059.3, 3070.7, 3073.0, 3077.9, 3079.2, 3081.0, 3095.1, 3103.9, 3111.6, 3112.9                                                                  |
| PMB    |    |                                                                                                                                                                                                                                                                                                                                                                                                                                                                                                                                                                                                                                                                                                                                                                                                                                                        |
| 1      |    | 36.3, 39.9, 57.6, 66.8, 78.6, 86.0, 89.0, 110.9, 123.2, 143.7, 164.5, 182.6, 211.4, 241.5, 289.5, 296.3, 305.8, 317.9, 342.0, 358.5, 372.0, 375.3, 409.0, 443.6, 486.3, 512.0, 520.3, 536.2, 547.3, 575.1, 582.0, 590.1, 625.2, 685.5, 700.6, 716.7, 720.5, 798.3, 809.7, 847.1, 900.7, 970.0, 976.7, 985.4, 993.8, 1003.7, 1014.3, 1026.2, 1029.1, 1062.6, 1070.0, 1081.6, 1125.7, 1217.0, 1225.8, 1300.7, 1328.7, 1337.5, 1353.6, 1356.1, 1360.7, 1368.6, 1393.4, 1414.4, 1419.1, 1422.8, 1433.7, 1437.8, 1441.1, 1448.8, 1463.3, 1467.7, 1476.4, 1483.2, 1577.0, 1606.0, 2904.6, 2947.1, 2952.6, 2957.5, 2969.5, 2995.1, 3001.4, 3016.4, 3019.5, 3028.5, 3047.1, 3047.9, 3064.6, 3081.4, 3128.0, 3155.3, 3343.0                                                                                                                                     |
| 1-2    | TS | 380.2i, 35.9, 47.9, 65.3, 67.3, 85.6, 91.8, 103.3, 113.5, 122.7, 128.5, 158.3, 160.9, 178.0, 180.3, 188.5, 199.6, 201.8, 231.4, 258.2, 274.1, 288.4, 311.9, 321.1, 336.2, 337.4, 362.9, 382.0, 388.6, 405.4, 441.0, 482.8, 511.1, 528.5, 542.7, 557.2, 564.3, 571.6, 587.6, 640.5, 655.4, 677.0, 686.4, 700.4, 721.7, 807.2, 857.5, 881.3, 896.6, 935.9, 966.0, 978.5, 981.6, 984.5, 999.7, 1006.1, 1010.3, 1014.3, 1021.0, 1028.0, 1071.7, 1075.2, 1088.6, 1107.3, 1218.2, 1220.8, 1302.0, 1330.8, 1336.3, 1352.9, 1353.8, 1358.4, 1361.7, 1366.1, 1368.0, 1376.0, 1406.1, 1417.0, 1419.9, 1421.9, 1435.2, 1437.0, 1444.3, 1450.1, 1459.1, 1468.0, 1477.4, 1537.4, 1599.4,                                                                                                                                                                            |

|                                    |    |                                                                                                                                                                                                                                                                                                                                                                                                                                                                                                                                                                                                                                                                                                                                                                                                                                                                                                                                                                                                      |
|------------------------------------|----|------------------------------------------------------------------------------------------------------------------------------------------------------------------------------------------------------------------------------------------------------------------------------------------------------------------------------------------------------------------------------------------------------------------------------------------------------------------------------------------------------------------------------------------------------------------------------------------------------------------------------------------------------------------------------------------------------------------------------------------------------------------------------------------------------------------------------------------------------------------------------------------------------------------------------------------------------------------------------------------------------|
|                                    |    | 1613.4, 2955.8, 2966.0, 2969.8, 2981.2, 2981.9, 3009.7, 3028.7, 3032.2, 3035.7, 3037.3, 3038.4, 3061.5, 3067.2, 3078.8, 3133.0, 3138.2, 3171.0, 3185.1, 3231.0, 3247.5, 3565.9                                                                                                                                                                                                                                                                                                                                                                                                                                                                                                                                                                                                                                                                                                                                                                                                                       |
| 2                                  |    | 35.4, 47.3, 55.3, 59.7, 68.6, 73.5, 85.0, 107.3, 124.7, 160.5, 168.5, 183.1, 199.1, 215.4, 232.8, 261.8, 263.5, 278.6, 285.6, 301.4, 326.6, 343.5, 356.4, 362.3, 368.4, 406.8, 437.5, 484.9, 541.5, 547.9, 548.9, 555.9, 571.7, 587.6, 636.2, 658.7, 664.2, 673.5, 686.3, 784.4, 846.4, 857.7, 872.5, 937.4, 954.1, 971.1, 980.6, 990.4, 995.4, 1001.0, 1016.4, 1019.4, 1044.1, 1082.5, 1091.2, 1092.5, 1097.9, 1169.2, 1211.7, 1264.5, 1311.4, 1331.6, 1333.6, 1336.3, 1348.3, 1361.0, 1370.3, 1377.0, 1396.7, 1402.7, 1404.6, 1416.8, 1422.8, 1432.4, 1435.1, 1440.1, 1441.7, 1454.7, 1456.0, 1466.6, 1481.9, 1512.2, 1609.9, 2945.2, 2949.5, 2969.2, 2973.1, 2981.1, 2999.3, 3005.5, 3014.7, 3020.0, 3033.2, 3070.0, 3077.0, 3079.1, 3079.7, 3087.4, 3102.7, 3123.9, 3141.5, 3189.8                                                                                                                                                                                                               |
| 3-4                                | TS | 28.4, 32.9, 60.2, 66.1, 71.2, 77.2, 84.7, 99.6, 105.2, 108.0, 112.5, 133.8, 176.1, 184.1, 195.3, 209.7, 222.1, 243.3, 244.7, 252.3, 266.7, 275.1, 292.2, 307.4, 329.4, 339.9, 359.6, 363.2, 388.4, 423.6, 427.5, 432.3, 481.2, 532.1, 553.1, 561.1, 579.7, 585.4, 590.8, 643.1, 652.6, 667.2, 698.1, 704.6, 711.8, 748.3, 766.2, 821.6, 842.4, 847.7, 853.8, 898.0, 923.1, 958.1, 960.7, 968.3, 985.1, 1001.4, 1013.1, 1017.5, 1027.5, 1065.1, 1078.9, 1093.4, 1104.3, 1107.0, 1116.8, 1157.8, 1180.7, 1190.3, 1220.0, 1257.1, 1310.6, 1335.8, 1350.9, 1359.5, 1364.1, 1366.1, 1371.8, 1384.5, 1397.3, 1418.1, 1420.1, 1424.6, 1426.6, 1427.5, 1435.6, 1436.6, 1440.2, 1443.4, 1452.0, 1456.2, 1464.7, 1473.7, 1585.7, 1616.3, 1627.7, 1676.0, 2953.5, 2965.0, 2969.3, 2977.2, 2978.5, 2999.0, 3006.9, 3017.7, 3031.3, 3038.1, 3052.9, 3054.3, 3070.8, 3074.6, 3087.4, 3087.6, 3102.8, 3131.8, 3133.1, 3173.6, 3181.4, 3403.5                                                                        |
| 4                                  |    | 431.6i, 40.3, 42.0, 55.8, 65.5, 70.3, 80.1, 98.3, 107.7, 117.7, 133.5, 138.2, 161.5, 173.9, 183.0, 190.3, 217.3, 235.6, 242.5, 249.8, 265.6, 279.4, 283.1, 297.7, 332.5, 340.5, 342.8, 363.1, 368.3, 373.4, 395.8, 413.7, 430.3, 484.8, 508.7, 540.4, 566.6, 567.0, 579.9, 581.5, 586.1, 621.3, 663.1, 664.2, 677.9, 695.1, 760.5, 770.3, 777.4, 850.6, 856.0, 881.4, 915.7, 929.0, 956.2, 964.1, 972.2, 981.9, 997.4, 999.8, 1001.5, 1015.3, 1017.6, 1026.1, 1055.0, 1078.8, 1083.8, 1097.2, 1103.7, 1119.6, 1178.8, 1198.3, 1265.0, 1321.5, 1338.7, 1340.5, 1350.7, 1353.9, 1356.8, 1362.3, 1370.1, 1389.4, 1401.4, 1414.5, 1423.3, 1424.1, 1427.2, 1434.2, 1439.1, 1449.0, 1454.6, 1457.1, 1469.2, 1528.1, 1590.1, 1608.5, 1656.3, 2812.2, 2954.8, 2984.6, 2992.1, 2997.0, 3002.6, 3008.7, 3054.9, 3056.0, 3066.4, 3071.2, 3073.9, 3074.2, 3079.0, 3093.7, 3099.0, 3107.4, 3112.4, 3145.0, 3166.8, 3242.6, 3266.9, 3643.4                                                                         |
| <b>stepwise methylation of 3-4</b> |    |                                                                                                                                                                                                                                                                                                                                                                                                                                                                                                                                                                                                                                                                                                                                                                                                                                                                                                                                                                                                      |
| SMS formation                      | IS | 37.8, 54.7, 69.5, 82.8, 85.6, 104.4, 107.4, 110.9, 117.4, 122.4, 128.3, 144.5, 151.3, 158.0, 168.8, 180.4, 188.3, 219.1, 232.5, 255.4, 266.3, 267.1, 271.1, 278.5, 311.1, 321.8, 343.5, 359.3, 363.4, 365.7, 385.6, 397.8, 406.5, 437.8, 455.6, 457.7, 547.4, 553.4, 560.1, 564.3, 572.2, 577.2, 610.6, 642.7, 655.5, 677.8, 682.8, 696.4, 727.1, 776.7, 784.1, 842.7, 881.8, 899.4, 909.8, 912.9, 949.2, 953.8, 965.8, 973.4, 993.1, 1005.6, 1016.1, 1030.1, 1052.3, 1063.9, 1073.8, 1076.9, 1083.9, 1090.6, 1099.4, 1130.6, 1136.5, 1195.6, 1259.6, 1292.7, 1308.4, 1337.6, 1348.8, 1350.3, 1357.4, 1362.0, 1373.2, 1389.0, 1394.3, 1397.9, 1416.7, 1423.9, 1429.2, 1431.6, 1432.4, 1437.7, 1438.2, 1439.2, 1443.1, 1447.9, 1454.8, 1461.2, 1465.9, 1477.3, 1572.7, 1590.5, 1606.0, 1647.1, 2663.7, 2828.6, 2973.2, 2976.7, 2979.8, 2991.9, 3008.0, 3019.4, 3021.9, 3024.4, 3025.5, 3056.0, 3061.0, 3066.7, 3067.6, 3073.7, 3083.9, 3110.8, 3121.6, 3136.4, 3150.1, 3194.0, 3204.4, 3207.9, 3208.4 |
|                                    | TS | 391.0i, 40.9, 58.2, 65.3, 84.3, 85.0, 95.5, 98.9, 109.1, 136.0, 144.2, 149.9, 151.0, 156.2, 162.8, 189.7, 198.2, 217.5, 235.7, 241.1, 255.2, 267.8, 279.4, 288.6, 317.7, 321.6, 340.8, 353.8, 354.8, 358.3, 381.9, 388.8, 402.0, 405.5, 417.4, 436.7, 453.6, 456.8, 557.2, 565.0, 568.9, 570.3, 576.9, 579.7, 603.0, 612.7, 644.3, 669.8, 691.8, 700.1, 703.2, 756.4, 777.2, 784.4, 836.8, 904.6, 906.3, 913.1, 918.9, 948.3, 964.1, 973.0, 993.4, 1004.7, 1024.2, 1031.9, 1059.3, 1064.1, 1074.6, 1075.4, 1083.0, 1094.5, 1098.9, 1129.8, 1198.0, 1216.6, 1259.6, 1294.2, 1336.1, 1348.1, 1350.4, 1350.9, 1357.9, 1358.9, 1360.6, 1372.9, 1390.6, 1396.8, 1419.7, 1425.3, 1429.1, 1431.8, 1436.7, 1438.8, 1442.8, 1448.2, 1455.1, 1462.5, 1465.1, 1474.2, 1551.3, 1573.8, 1607.2, 1654.4, 2972.0, 2972.7, 2976.3, 2986.4, 2999.8, 3003.8, 3016.3, 3016.9, 3049.0, 3049.4, 3055.5, 3058.1, 3064.1, 3067.4, 3068.7, 3119.0, 3148.0, 3185.6, 3200.1, 3203.1, 3215.0, 3242.0, 3263.3, 3385.2, 3525.9    |
|                                    | FS | 50.8, 58.8, 67.0, 74.1, 80.4, 91.9, 97.8, 98.7, 108.0, 114.3, 145.3, 150.3, 159.2, 167.8, 172.7, 184.6, 189.7, 222.8, 235.0, 247.4, 261.3, 269.7, 270.2, 278.8, 287.9, 299.1, 324.3, 339.6, 342.9, 347.7, 353.2, 370.3, 386.0, 395.9, 405.8, 439.5, 457.2, 458.5, 529.3, 553.7, 565.6, 566.7, 578.8, 583.3, 600.6, 607.8, 612.5, 687.3, 709.5, 712.6, 729.6, 746.9, 777.2, 783.6, 816.3, 901.0, 901.2, 909.7, 914.9, 946.5, 963.9, 974.6, 994.5, 1004.6, 1025.4, 1028.6, 1064.4, 1075.0, 1082.1, 1093.8, 1099.4, 1116.6, 1129.0, 1169.4, 1198.7, 1259.6, 1298.3, 1335.9, 1347.4, 1350.8, 1357.1, 1360.3, 1371.6, 1386.8, 1400.9, 1406.1, 1419.3, 1425.5, 1428.4, 1429.2, 1432.4, 1437.1, 1437.4, 1442.0, 1444.1, 1450.0, 1454.1, 1462.1, 1464.5, 1475.0, 1559.6, 1585.5, 1613.0, 1655.8, 2966.5, 2976.2, 2976.9, 2982.1, 2995.7, 3001.6, 3007.2, 3012.0, 3021.4, 3049.4, 3050.7, 3057.1, 3060.9, 3063.4, 3071.1, 3107.5, 3114.1, 3140.3, 3166.9, 3177.5, 3196.6, 3205.1, 3225.0, 3463.0, 3740.5      |

|             |    |                                                                                                                                                                                                                                                                                                                                                                                                                                                                                                                                                                                                                                                                                                                                                                                                                                                                                                                                  |
|-------------|----|----------------------------------------------------------------------------------------------------------------------------------------------------------------------------------------------------------------------------------------------------------------------------------------------------------------------------------------------------------------------------------------------------------------------------------------------------------------------------------------------------------------------------------------------------------------------------------------------------------------------------------------------------------------------------------------------------------------------------------------------------------------------------------------------------------------------------------------------------------------------------------------------------------------------------------|
| methylation | IS | 56.0, 60.0, 65.9, 80.9, 89.7, 94.4, 105.4, 112.3, 141.9, 163.5, 179.1, 200.7, 212.4, 244.6, 246.1, 252.1, 268.1, 268.3, 287.1, 293.7, 309.7, 322.7, 334.6, 341.4, 352.3, 358.4, 372.0, 378.6, 402.1, 427.4, 442.8, 457.1, 468.5, 520.8, 551.4, 554.7, 566.8, 577.5, 594.4, 608.8, 610.6, 697.4, 699.6, 708.4, 727.4, 742.1, 770.3, 786.7, 827.5, 894.5, 911.7, 916.0, 925.1, 954.4, 967.6, 974.8, 991.6, 1004.8, 1025.3, 1026.4, 1070.3, 1076.1, 1080.1, 1094.5, 1101.8, 1121.0, 1136.7, 1163.6, 1205.3, 1262.1, 1288.4, 1332.3, 1341.6, 1354.8, 1356.2, 1365.2, 1368.9, 1389.9, 1400.1, 1419.6, 1424.3, 1426.0, 1429.7, 1431.1, 1434.5, 1435.1, 1437.8, 1440.6, 1445.3, 1448.3, 1451.7, 1458.1, 1465.3, 1471.4, 1567.6, 1615.7, 1659.8, 2963.3, 2969.5, 2971.9, 2972.7, 2980.2, 2982.0, 2987.4, 3010.9, 3014.6, 3019.8, 3028.6, 3038.3, 3058.4, 3064.3, 3072.9, 3090.7, 3116.4, 3116.9, 3179.9, 3192.8, 3197.0, 3221.0, 3225.8  |
|             | TS | 463.4i, 55.2, 65.3, 85.2, 92.5, 99.9, 104.9, 127.2, 140.6, 153.1, 186.6, 192.5, 209.0, 219.9, 248.5, 261.8, 272.9, 274.1, 286.1, 298.7, 310.5, 315.1, 326.2, 340.6, 350.1, 354.8, 374.8, 379.3, 384.2, 398.3, 428.2, 441.5, 463.5, 465.8, 554.7, 560.9, 577.6, 578.2, 582.2, 584.8, 591.4, 612.9, 660.8, 706.2, 717.4, 750.2, 777.1, 790.5, 880.1, 888.3, 895.7, 916.6, 922.9, 953.9, 956.8, 970.5, 976.4, 989.7, 997.4, 1004.2, 1024.3, 1029.2, 1070.7, 1073.3, 1078.6, 1093.2, 1101.7, 1112.9, 1136.4, 1207.3, 1266.8, 1293.8, 1337.0, 1338.1, 1347.4, 1357.9, 1360.0, 1366.1, 1367.3, 1369.8, 1383.4, 1413.4, 1415.0, 1422.0, 1426.8, 1428.7, 1434.2, 1434.5, 1443.6, 1446.3, 1447.3, 1454.6, 1466.1, 1470.1, 1527.4, 1591.2, 1643.0, 2974.1, 2974.7, 2974.9, 2977.9, 2981.6, 2982.9, 3019.4, 3023.4, 3024.4, 3031.6, 3047.4, 3056.2, 3066.8, 3068.8, 3083.8, 3117.6, 3185.7, 3189.7, 3197.9, 3211.7, 3231.6, 3234.5, 3268.0  |
|             | FS | 55.8, 61.4, 63.2, 78.8, 93.1, 99.3, 109.5, 126.3, 144.0, 160.1, 189.8, 203.7, 216.1, 218.2, 248.4, 251.8, 261.9, 272.4, 278.8, 300.5, 301.5, 313.3, 328.7, 349.0, 362.9, 364.1, 383.0, 394.3, 399.0, 425.5, 436.2, 464.7, 467.4, 542.3, 553.5, 562.7, 567.9, 587.8, 594.8, 609.4, 636.1, 658.5, 681.5, 741.2, 772.7, 784.5, 825.2, 851.9, 926.1, 934.3, 940.8, 952.0, 957.9, 965.7, 991.8, 998.9, 1008.8, 1018.1, 1029.2, 1039.9, 1070.3, 1077.1, 1089.4, 1096.0, 1097.3, 1112.8, 1206.8, 1213.6, 1242.9, 1268.3, 1323.8, 1329.1, 1338.0, 1352.0, 1355.7, 1359.2, 1364.5, 1369.9, 1375.6, 1399.3, 1406.0, 1414.8, 1422.8, 1426.0, 1427.3, 1431.1, 1431.9, 1437.6, 1440.0, 1447.0, 1453.3, 1458.9, 1466.7, 1485.0, 1490.8, 1525.0, 1595.8, 2974.0, 2978.0, 2982.2, 2989.7, 2991.1, 2991.7, 2998.4, 3020.5, 3035.6, 3036.8, 3041.1, 3047.6, 3060.3, 3070.5, 3077.5, 3082.9, 3083.5, 3103.9, 3139.3, 3173.4, 3206.2, 3217.8, 3240.7 |

## S 9 DATA OF THE STUDIED STRUCTURES

All the studied structures in CIF and XYZ format are available in the attached ZIP file.

## S 10 ADDITIONAL REFERENCES

1. Baerlocher, C.; McCusker, L. B. Database of Zeolite Structures. <http://www.iza-structure.org/databases/>.
2. Momma, K.; Izumi, F., VESTA 3 for three-dimensional visualization of crystal, volumetric and morphology data. *J. Appl. Crystallogr.* **2011**, *44* (6), 1272-1276.
3. Fečík, M.; Plessow, P. N.; Studt, F., A Systematic Study of Methylation from Benzene to Hexamethylbenzene in H-SSZ-13 Using Density Functional Theory and Ab Initio Calculations. *ACS Catal.* **2020**, *10* (15), 8916-8925.
4. Plessow, P. N.; Studt, F., Unraveling the Mechanism of the Initiation Reaction of the Methanol to Olefins Process Using ab Initio and DFT Calculations. *ACS Catal.* **2017**, *7* (11), 7987-7994.
5. Wang, C.-M.; Wang, Y.-D.; Du, Y.-J.; Yang, G.; Xie, Z.-K., Similarities and differences between aromatic-based and olefin-based cycles in H-SAPO-34 and H-SSZ-13 for methanol-to-olefins conversion: insights from energetic span model. *Catal. Sci. Technol.* **2015**, *5* (9), 4354-4364.
6. Wang, C.-M.; Wang, Y.-D.; Du, Y.-J.; Yang, G.; Xie, Z.-K., Computational insights into the reaction mechanism of methanol-to-olefins conversion in H-ZSM-5: nature of hydrocarbon pool. *Catal. Sci. Technol.* **2016**, *6* (9), 3279-3288.
